# Supplementary material for: Saskemycin, a potent and selective antimycobacterial agent targeting a unique site on the ribosome
Source: Research Square preprint supplement (doi:10.21203/rs.3.rs-7820265/v1), 2025-11-07
Supplement: Supplementary file 1 [file 9eab38398187e5a5486da4de.docx]

**Saskemycin, a potent and selective antimycobacterial agent targeting a unique site on the ribosome**

Michael A. Cook*,1, Min Xu*,1,2, Martino Morici*,3, Dmitrii Y. Travin*,4,5, Wenliang Wang1, Dorota Klepacki4,5, Nandini Chhabra6, Vishwas N. Rao1,7, Henok Sahile8, Dirk Hackenberger1, Haaris A. Safdari3, Max Berger3, Martina Corazza3, Austin N. Bond9, Allison K. Guitor1, Dominique Tertigas1,10, Lijun Wang1,11, Adam J. Schaenzer1, Linda Ejim1, Venkateswarlu Yarlagadda12, James E. Gomez9, Michael G. Surette1,10, Yossef Av-Gay8, Neeraj Dhar6, Deborah T Hung9, Nora Vázquez-Laslop4,5, Alexander S. Mankin4,5, #, Daniel N. Wilson3, #, Gerard D. Wright^,1, #

* Authors contributed equally to the work

# corresponding authors’e-mail: [wrightge@mcmaster.ca](mailto:wrightge@mcmaster.ca), [shura@uic.edu](mailto:shura@uic.edu), [daniel.wilson@uni-hamburg.de](mailto:daniel.wilson@uni-hamburg.de)

Addresses:

1 David Braley Center for Antibiotic Discovery, Michael G. DeGroote Institute for Infectious Disease Research, Department of Biochemistry and Biomedical Sciences, McMaster University, Hamilton, Ontario, Canada.

2 Tianjin Institute of Industrial Biotechnology, Chinese Academy of Sciences, Tianjin 300308, China.

3 Institute for Biochemistry and Molecular Biology, University of Hamburg, Martin-Luther-King-Platz 6, 20146 Hamburg, Germany.

4 Center for Biomolecular Sciences, University of Illinois at Chicago, Chicago, IL, USA.

5 Department of Pharmaceutical Sciences, University of Illinois at Chicago, Chicago, IL, USA.

6 Vaccine and Infectious Disease Organization, Saskatoon, Canada. Department of Biochemistry, Microbiology and Immunology, University of Saskatchewan, Saskatoon, Canada.

7 Medical Scientist Training Program, School of Medicine, Duke University, Durham, North Carolina, USA.

8 Departments of Medicine and Microbiology and Immunology, The University of British Columbia, Vancouver, British Columbia, Canada.

9 Infectious Disease and Microbiome Program, Broad Institute of Harvard and MIT, Cambridge, MA, USA. Department of Genetics, Harvard Medical School, Boston, MA, USA. Department of Molecular Biology and Center for Computational and Integrative Biology, Massachusetts General Hospital, Boston, MA, USA.

10 Farncombe Family Digestive Health Research Institute, McMaster University, Hamilton, ON, Canada

11 Laboratory of Microbial Resources and Biotechnology, Institute of Microbiology, Chinese Academy of Science, Beijing, China.

12 Department of Chemistry, Indian Institute of Technology Bombay, Mumbai, India.

**Determination of the SKM chemical structure**

Stereochemistry of the sugars was determined from the ribosome-bound 3D-structure and confirmed by 3J proton-proton coupling constants (**Table S1**). Assignment of the guanidino bridge between the oligosaccharide moiety and the polyguanidino acyl chain was confirmed by the observation of distinctive heteronuclear multiple bond correlations (HMBC) between H1ꞌ (*δ*H 4.66 ppm, d, *J* = 8.2 Hz)/ C2 (*δ*C 156.1 ppm) and H4 (*δ*H 3.18 ppm, 2H, br m)/C2 (*δ*C 156.1 ppm) (**Fig. S7, Table S1**). The amide bond formed by 11-(2-methylguanidino)-undecanoic acylation on the polyagmatine moiety was assigned by the observation of HMBC correlations between H35 (*δ*H 3.09 ppm, 2H, m, overlapped), C37 (*δ*C 177 ppm), and H38 (*δ*H 2.12 ppm, 2H, t, *J* = 7.0 Hz)/C37 (*δ*C 177 ppm) (**Fig. S7, Table S1**). Matrix-assisted laser desorption/ionization (MALDI)-TOF MS/MS analysis was also performed to confirm the structure of SKM. The product ions of the polyagmatine acyl chain tail were clearly observed from the MALDI-TOF MS/MS spectrum (**Fig. S9**). The components of the tetra-saccharide head were confirmed through partial hydrolysis of SKM in 1.5 N HCl at 40 °C overnight (**Fig. S10A**), followed by the observation of the expected tri-/di-/mono- saccharide SKM product masses of 362.9972 ([M+4H]4+, calculated: 362.9963), 322.4837 ([M+4H]4+, calculated: 322.4831), 271.7135 ([M+4H]4+, calculated: 271.7132), and the polyagmatine acyl chain product mass of 293.5954 ([M+3H]3+, calculated: 293.5957) using HR-ESI-qTOF-MS analysis (**Fig. S10B**).

Given the structural complexity of SKM and the similarity between repeat units of the polyagmatine tail, the signals in the proton and carbon NMR are highly overlapped and difficult to interpret. Accordingly, SKM was partially hydrolyzed in 6 N HCl at 80 °C for 2 h followed by MS and MS/MS analyses (**Fig. S11**). The polyguanidino acyl product was confirmed by the observation of the signal masses of 220.4489 ([M+4H]4+, calculated: 220.4486) and 293.5956 ([M+3H]3+, calculated: 293.5957) (**Fig. S11B**). The polyagmatine acyl group product was isolated and further fragmented using MS/MS to confirm its structure (**Fig. S11C**). Finally, SKM was completely hydrolyzed in 6 N HCl at 102 °C for 2 days to cleave the amide bond of the guanidine-terminating acyl group (**Fig. S12A**). The polyagmatine chain was confirmed by observation of the mass of 639.5730 ([M+H]+, calculated: 639.5729) and MS/MS fragmentation pattern (**Fig. S12B**). The terminal 11-(2-methylguanidino)-undecanoic acid was confirmed by the observation of the mass of 258.2177 ([M+H]+, calculated: 258.2176) and MS/MS fragmentation pattern (**Fig. S12C**).

**
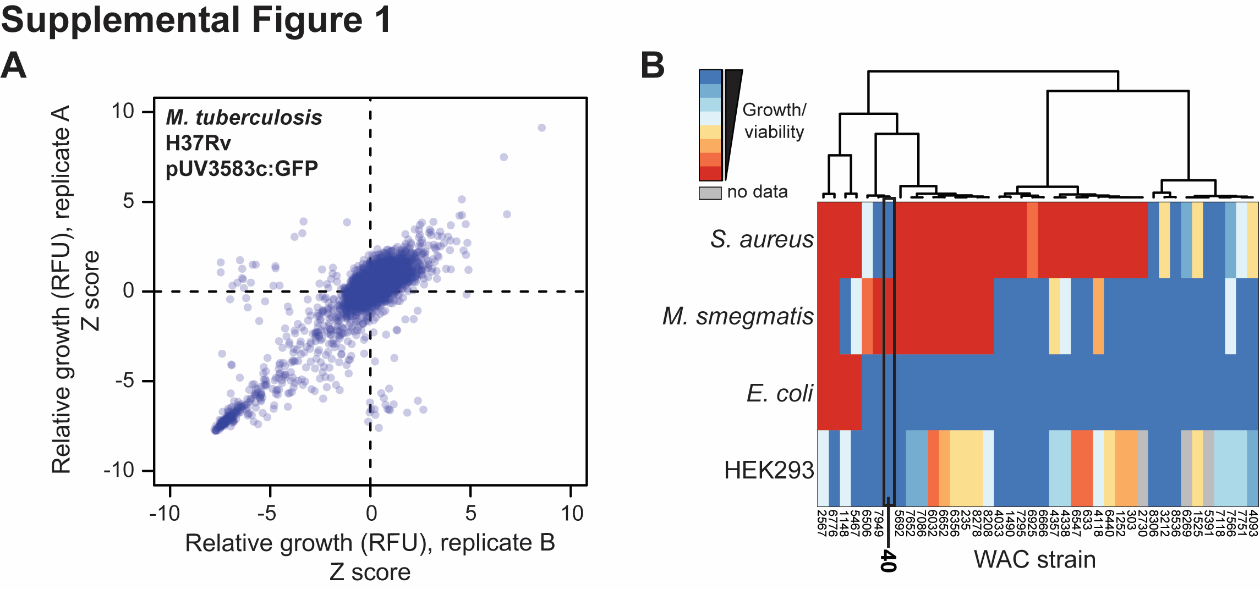
**

**Figure S1. Natural product extract screen and validation. A.** NP screen of *M. tuberculosis* H37Rv pUV3583c:GFP. Z scores representing relative growth rate, as inferred from GFP fluorescence, are shown in duplicate. **B.** Growth inhibition assays of *S. aureus*, *M. smegmatis*, *E. coli* and HEK293 cell viability assay with crude cell extracts of 40 candidate hits. An extract with mycobacterial-specific activity and no toxicity in HEK293 cells is indicated. The average values of duplicate assays are shown.

**
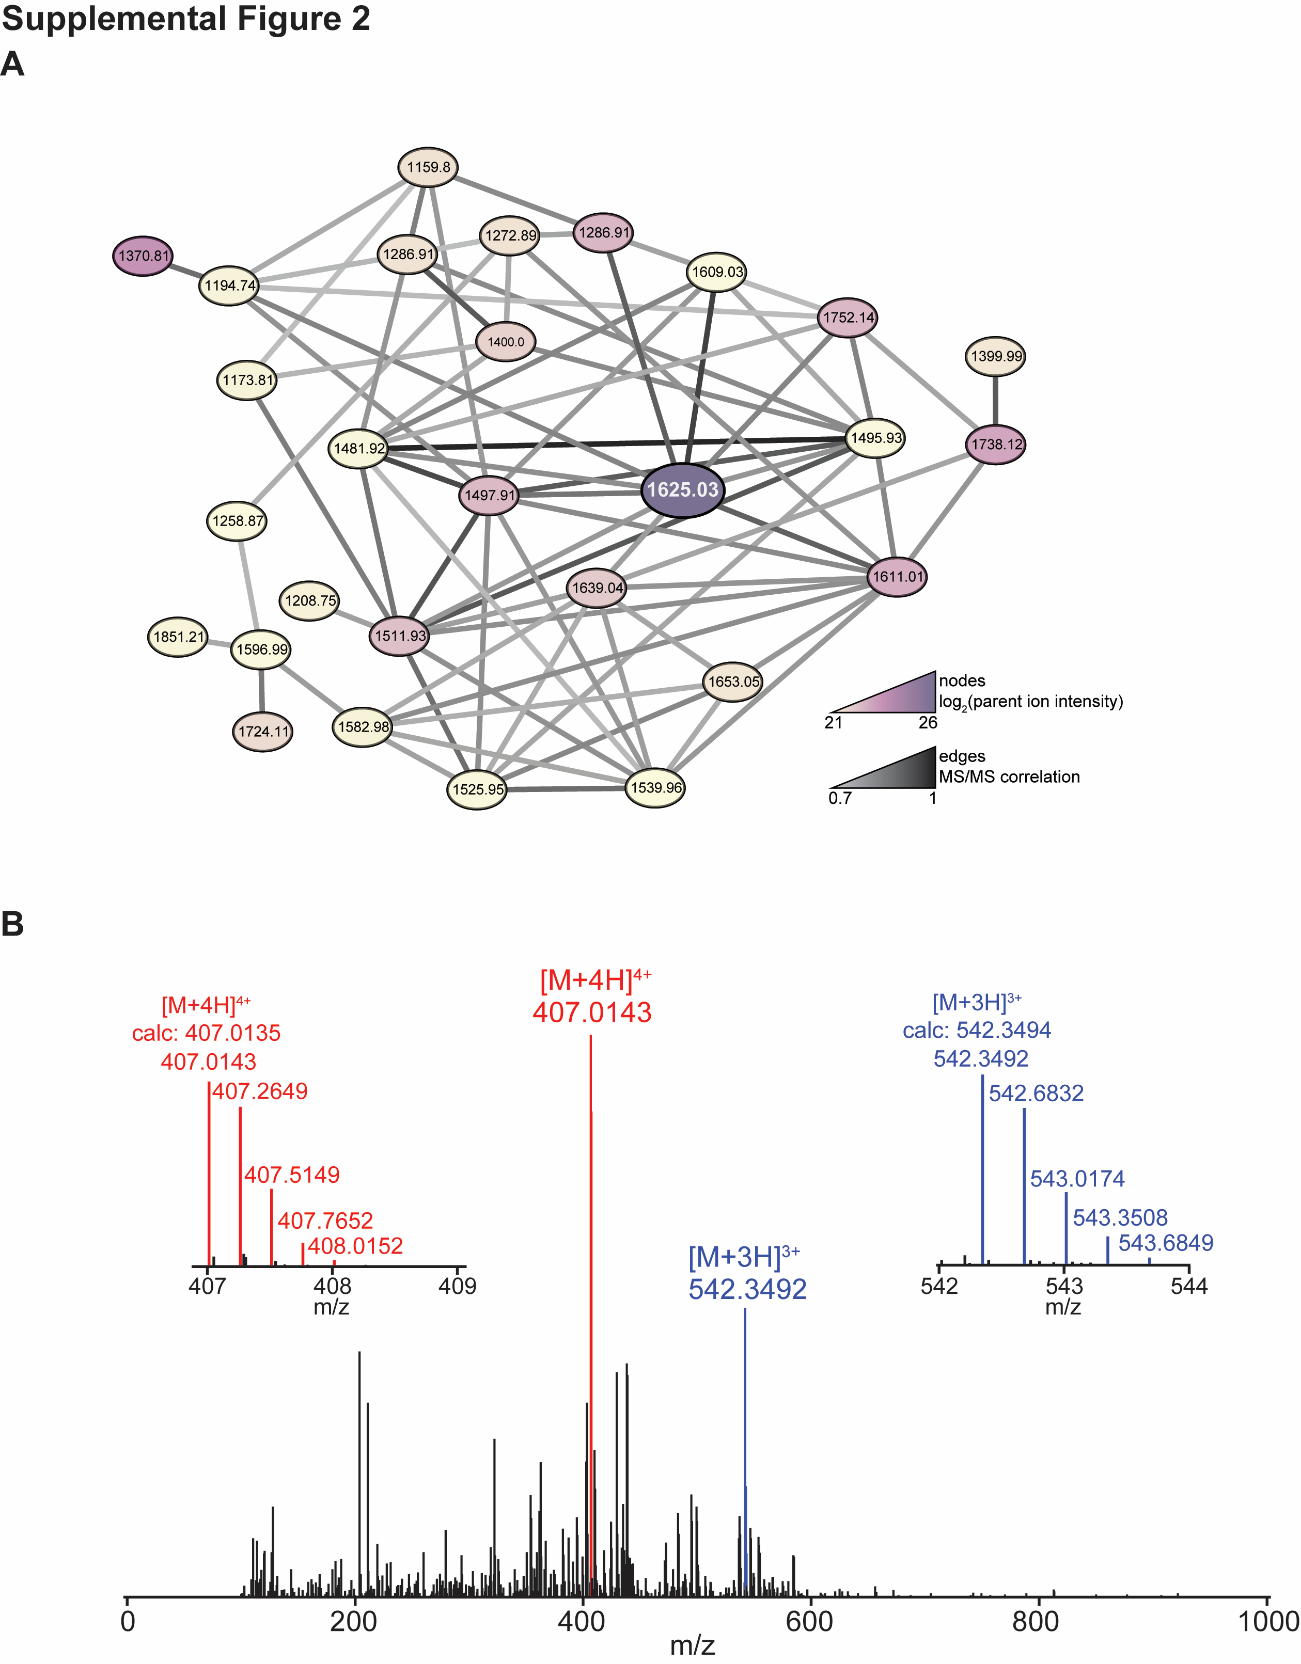
**

**Figure S2. Identification of SKM and its analogues by LC-MS. A.** GNPS molecular network of SKM-related molecular masses. Edge color indicates correlation score between fragmentation patterns (grey to black). Node color indicates log2 precursor intensity (light yellow to purple). The mass of a SKM-related compound (+1 isotope) is indicated by white text. **B.** High resolution mass spectrometry (HR-MS) analysis of SKM.Triple- and tetra- protonated mass signals are magnified and shown in blue and red colors, respectively.


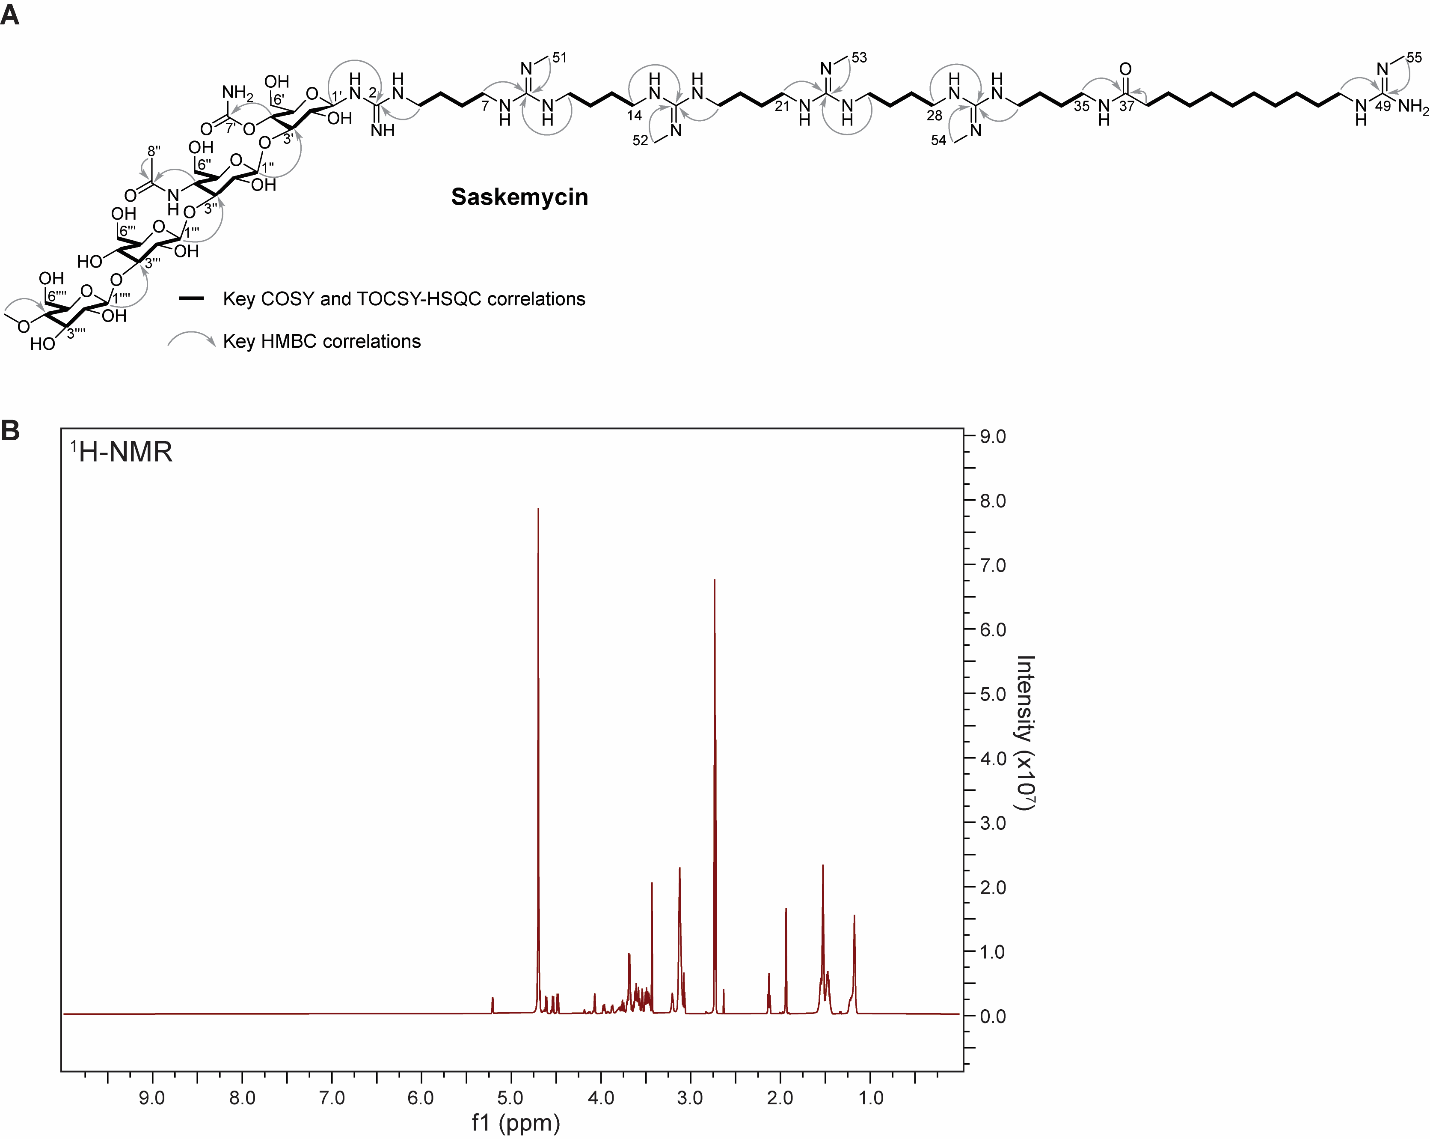


**Figure S3. 2D NMR correlations and 1D NMR spectrum of SKM. A.** Key COSY and TOCSY-HSQC correlations are shown in bold lines, and the key HMBC correlations are shown as curved arrows. **B.** Proton NMR spectrum of SKM recorded in D2O.

**
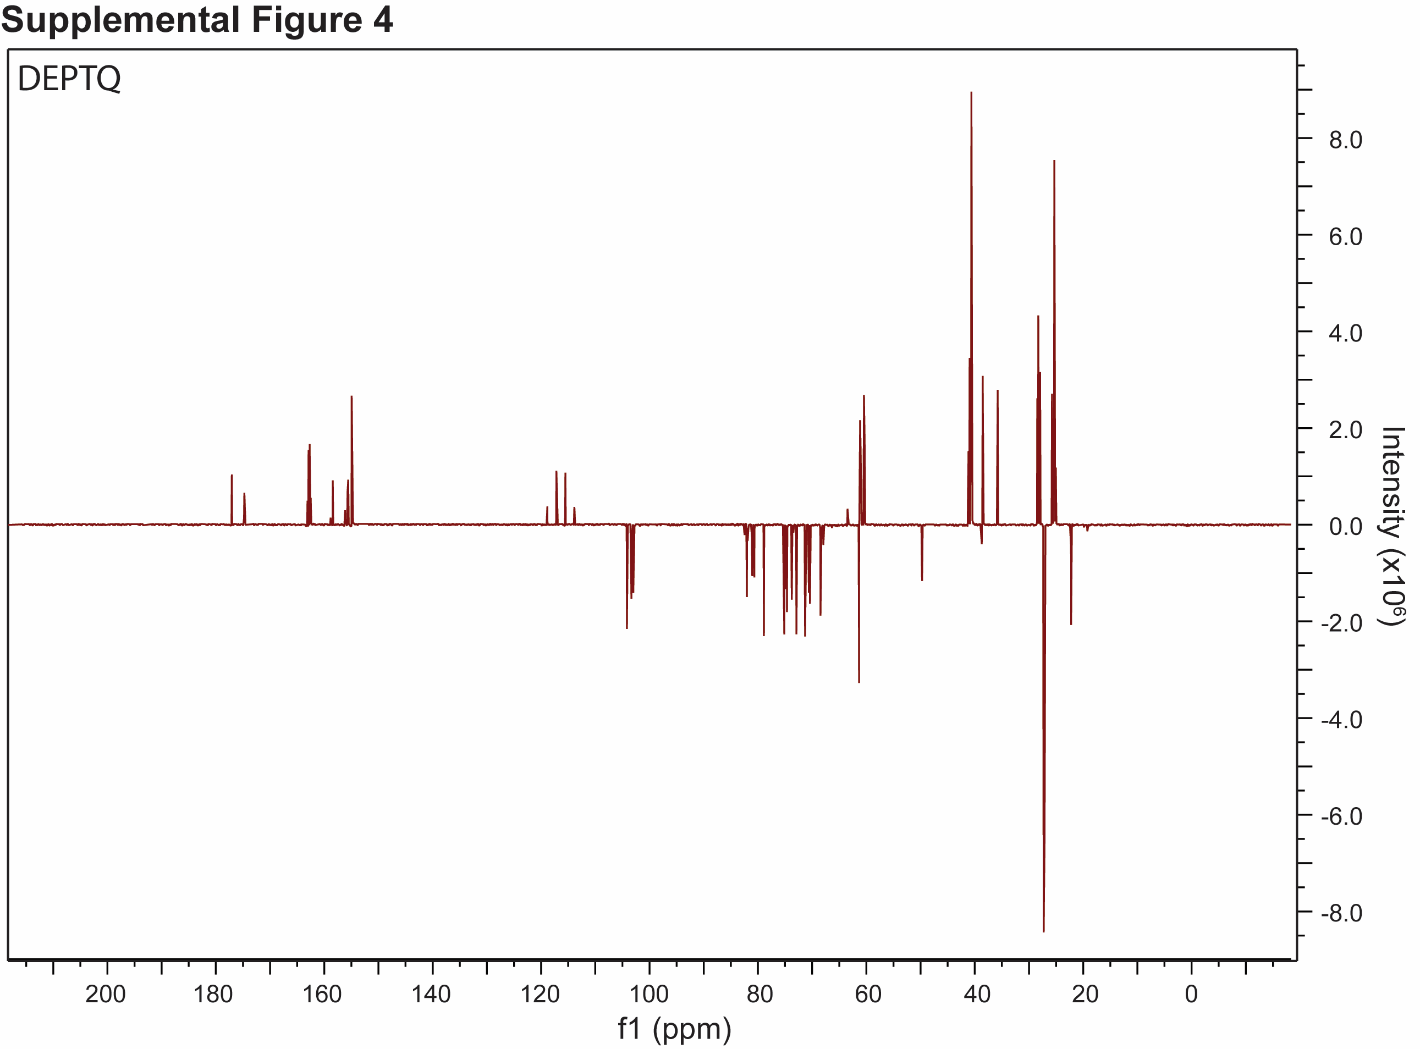
Figure S4. DEPTQ NMR spectrum of SKM recorded in D2O.**

**
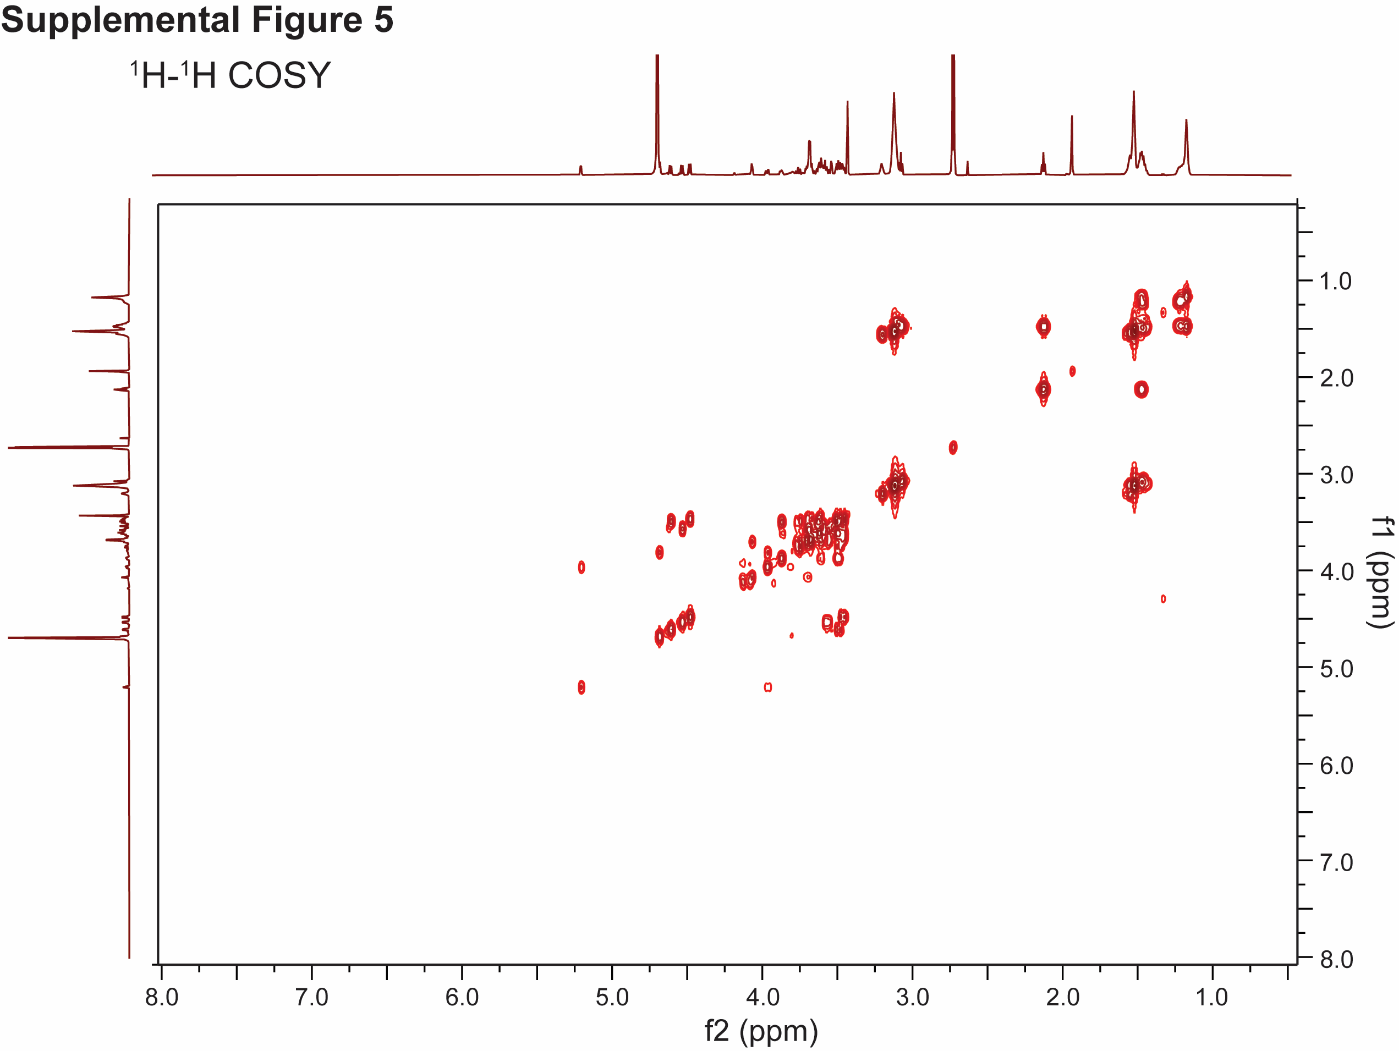
Figure S5. 1H-1H COSY spectrum of SKM recorded in D2O.**

**
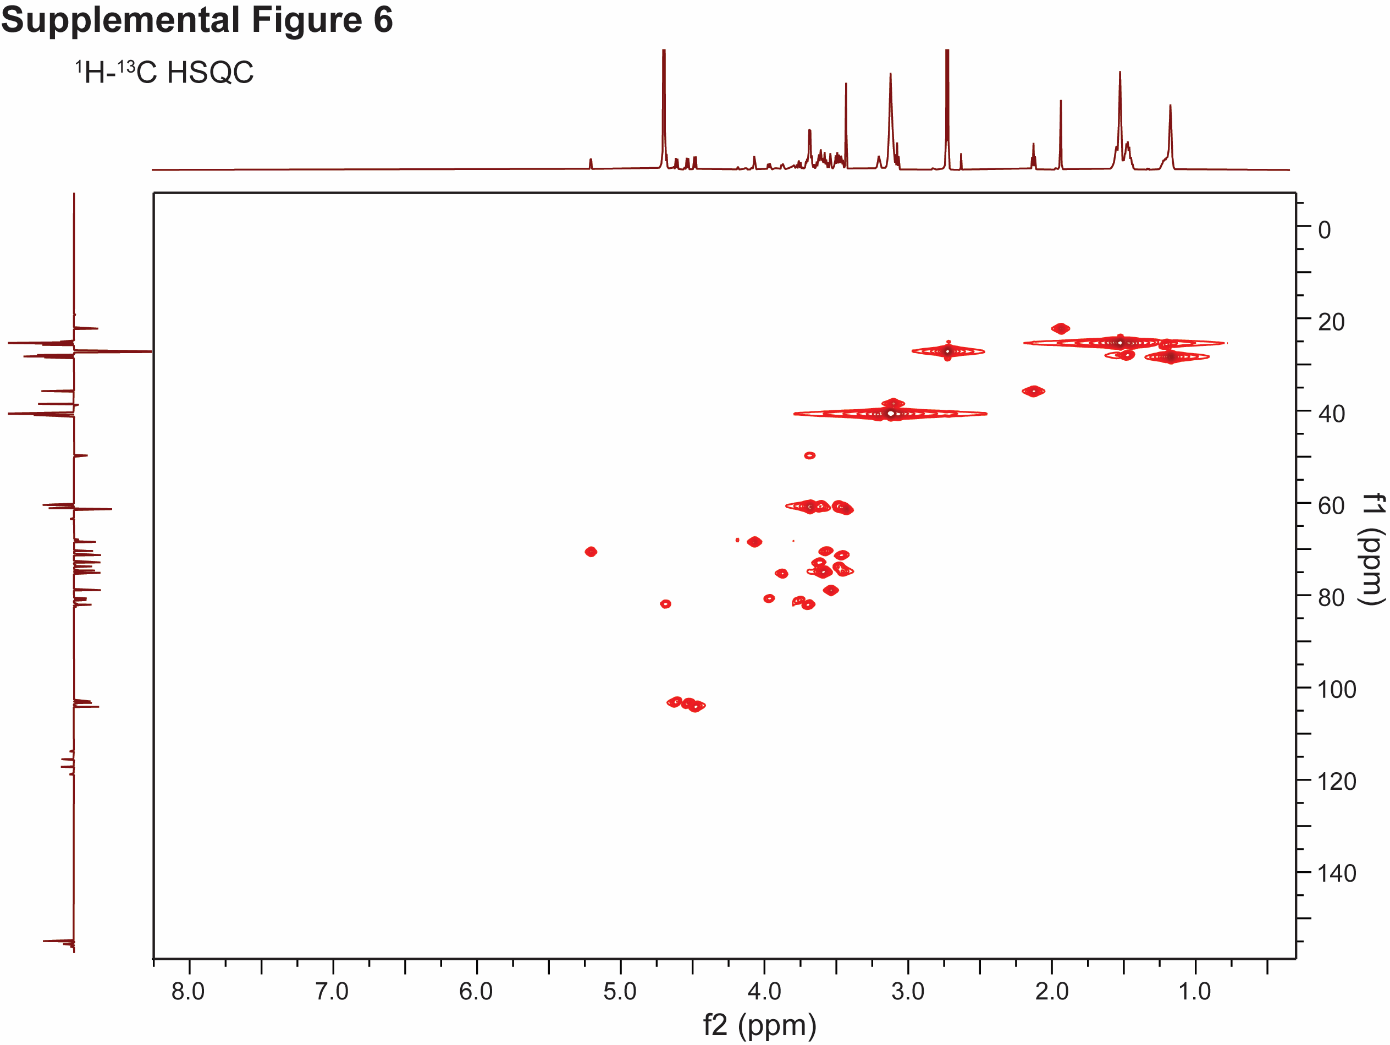
Figure S6. 1H-13C HSQC spectrum of SKM recorded in D2O.**

**
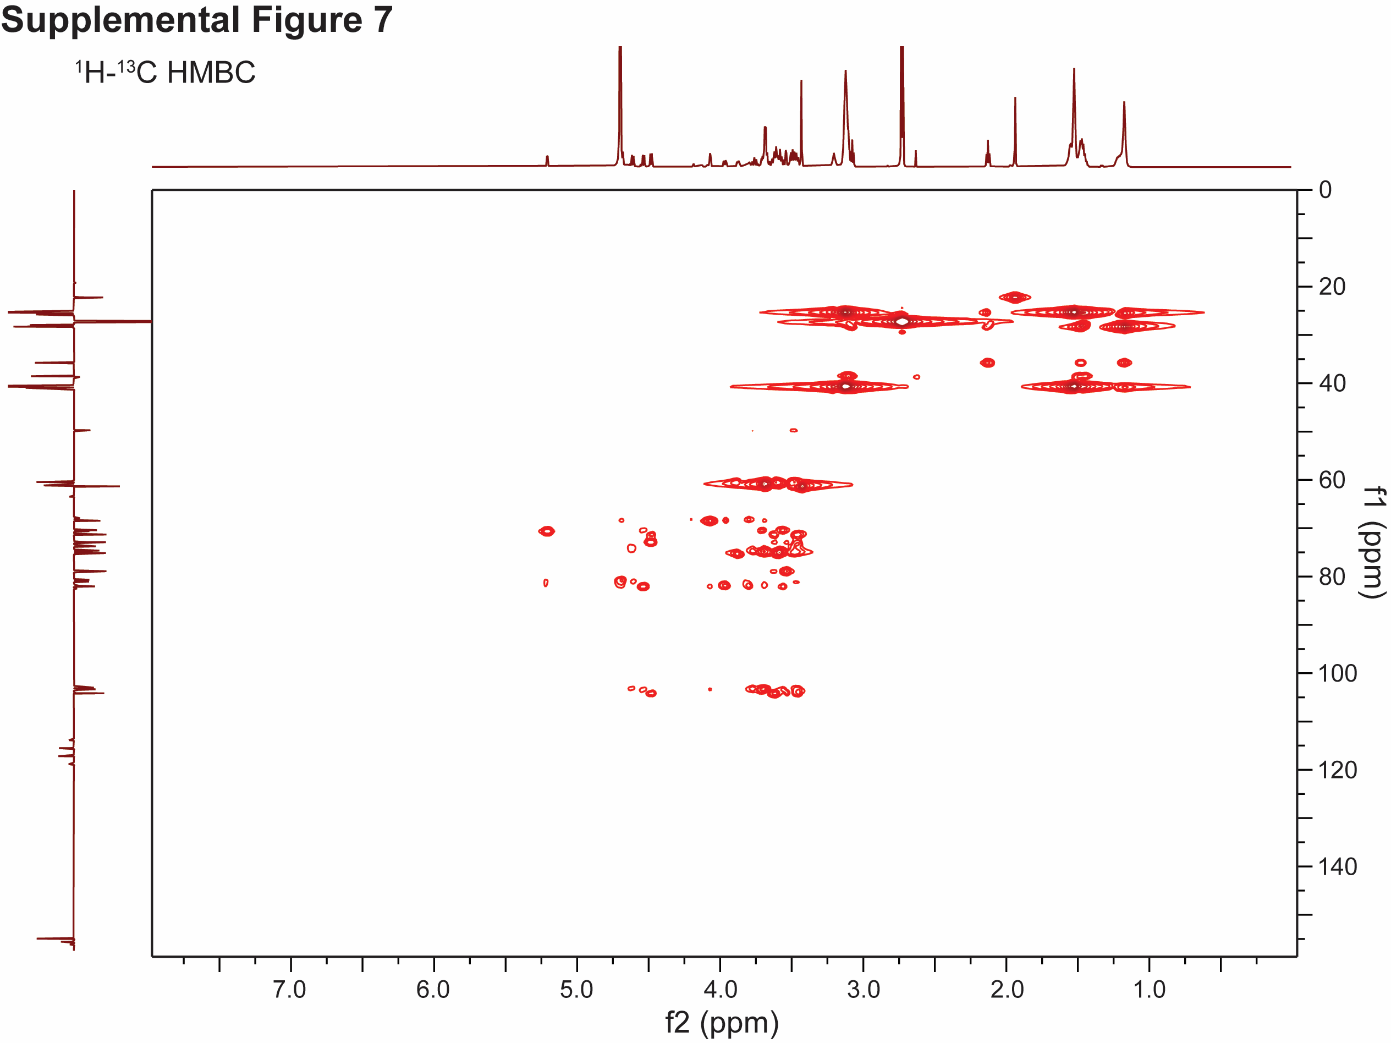
Figure S7. 1H-13C HMBC spectrum of SKM recorded in D2O.**

**
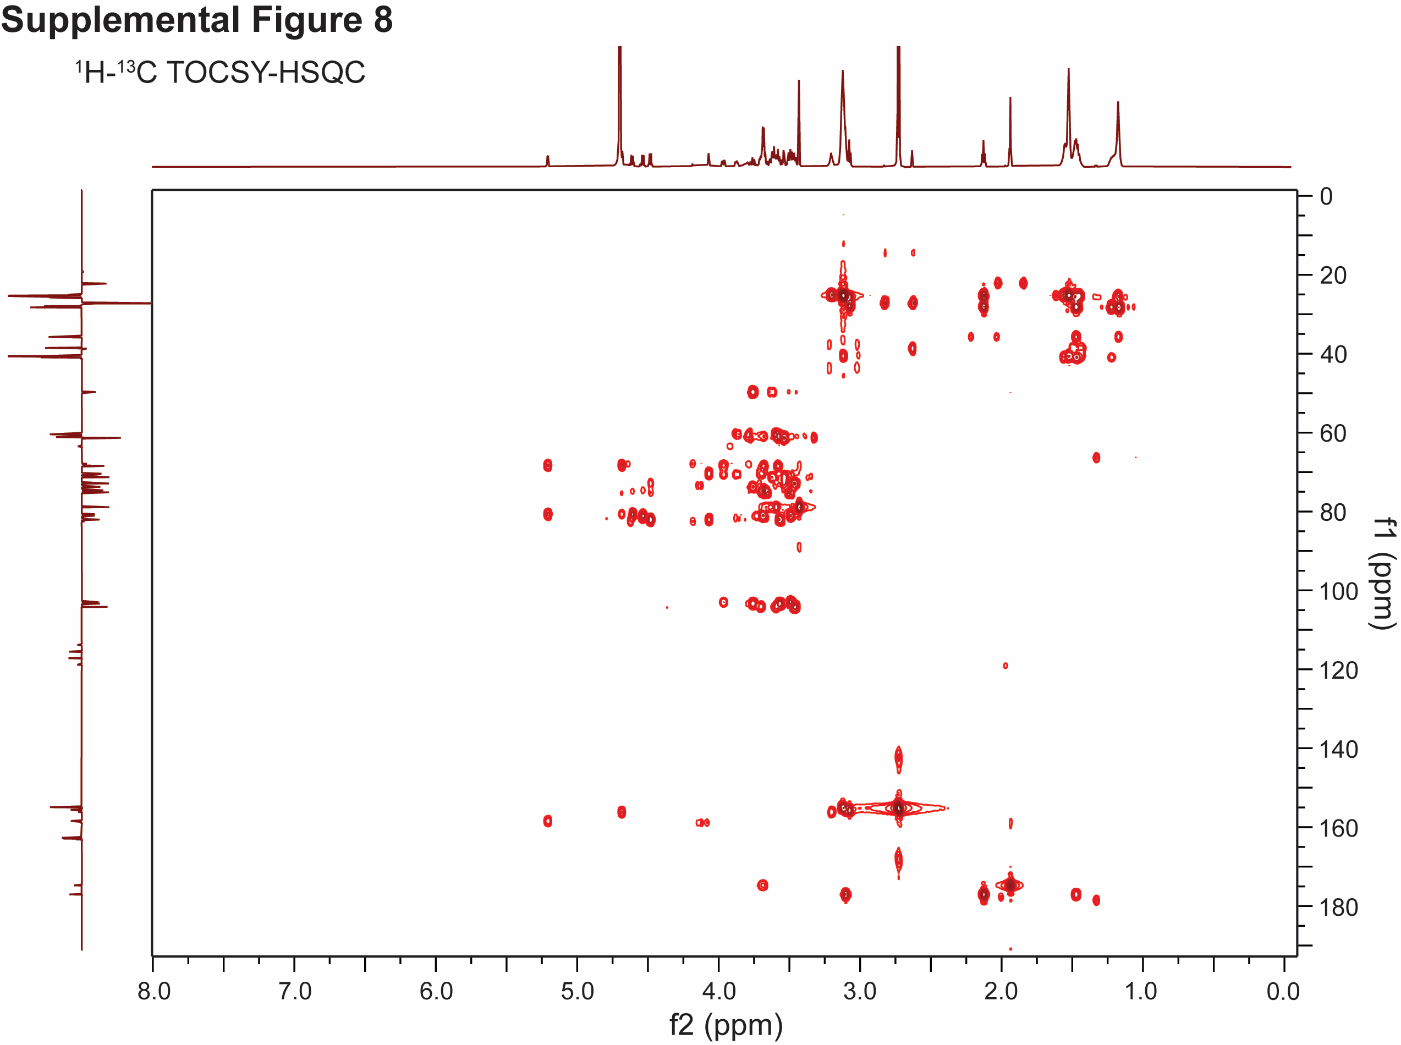
Figure S8. 1H-13C TOCSY-HSQC spectrum of SKM recorded in D2O.**

**
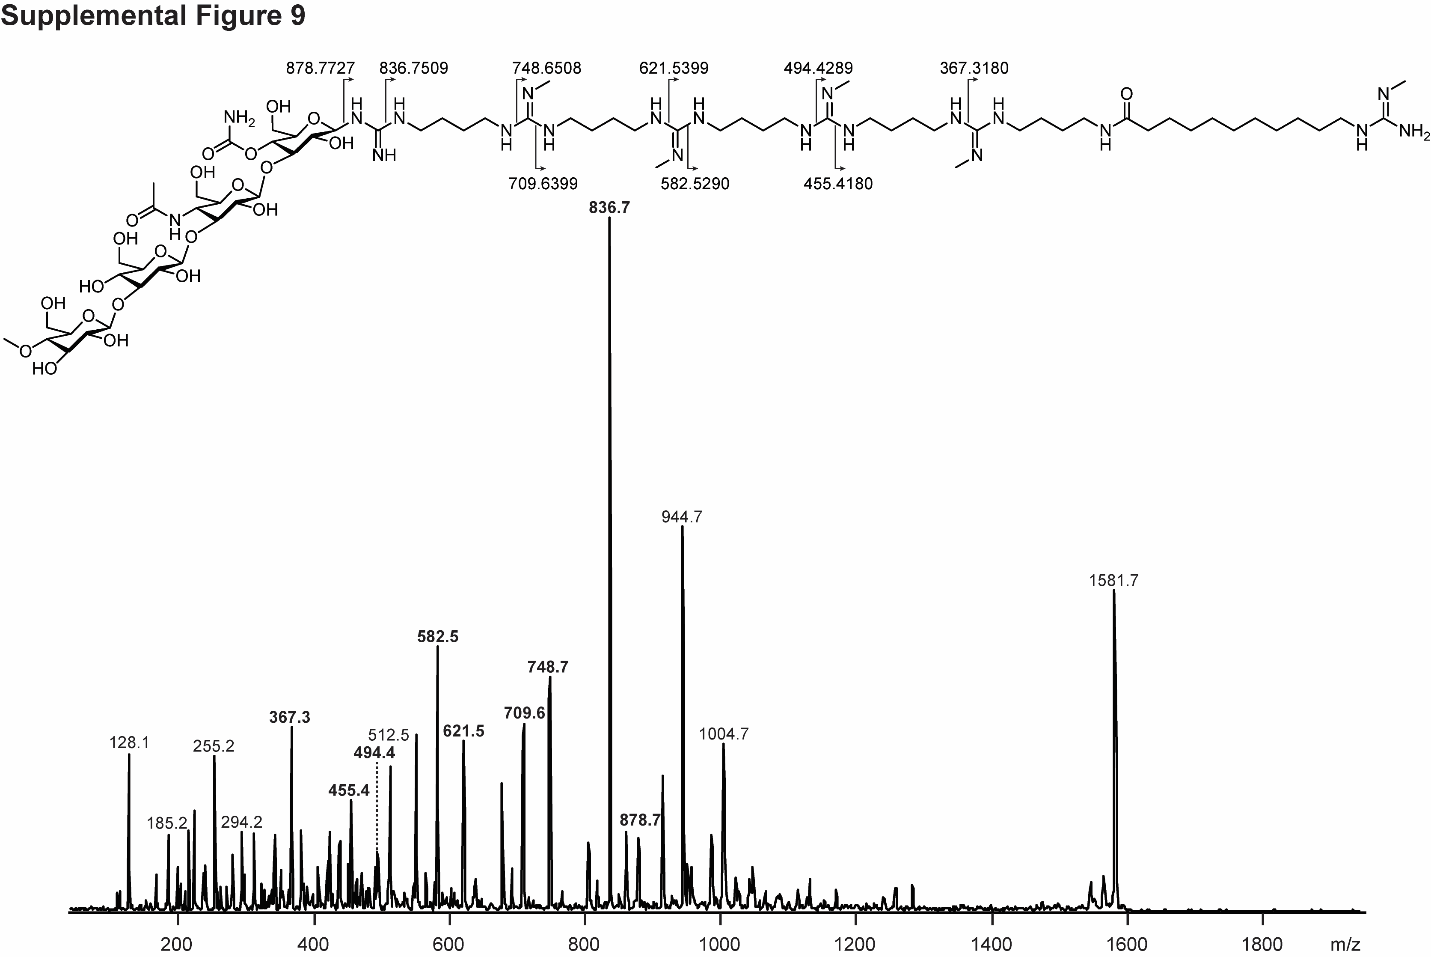
**

**Figure S9. MALDI-TOF MS/MS spectrum of SKM.**

**
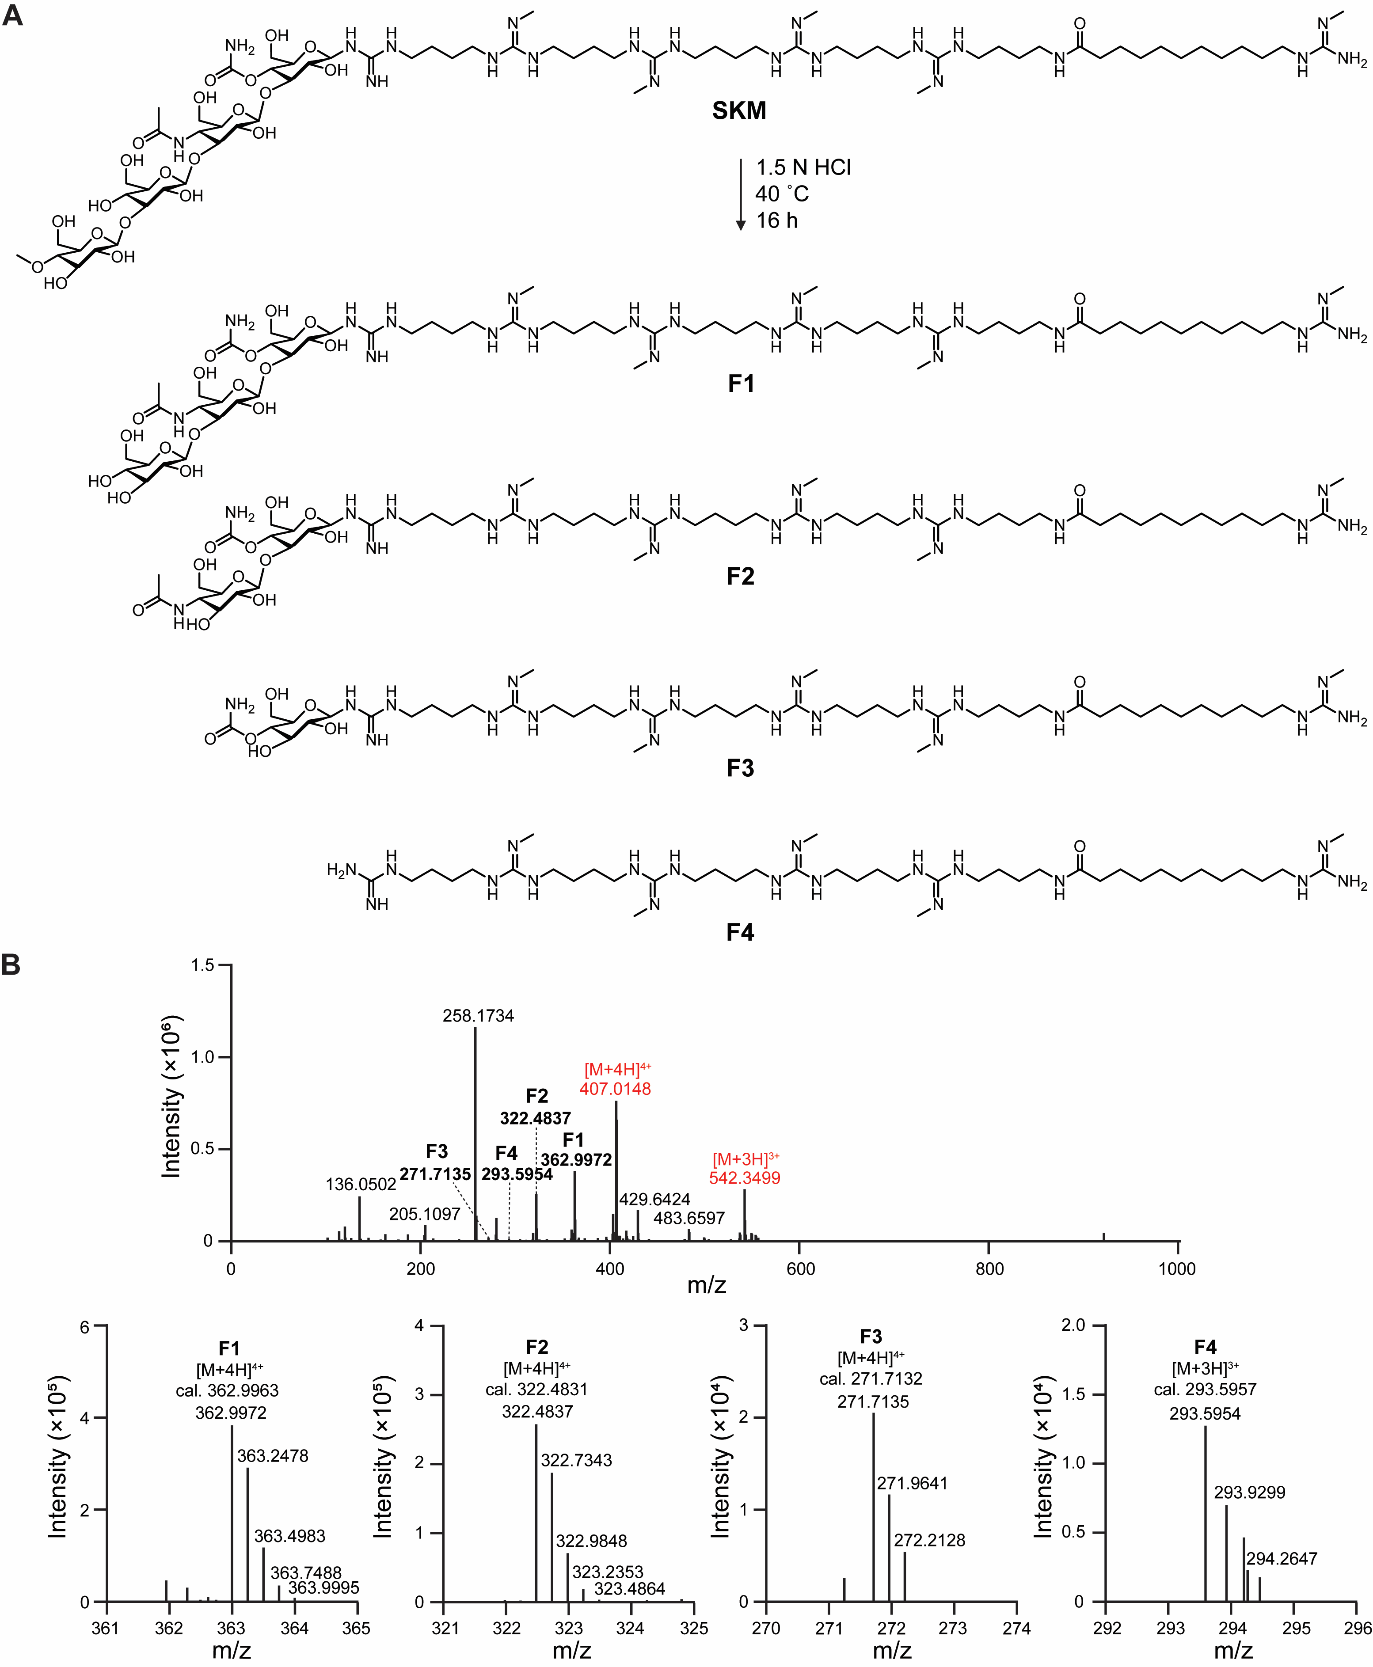
**

**Figure S10. Characterization of the oligosaccharide moiety of SKM through partial hydrolysis. A.** Scheme of the partial hydrolysis of the oligosaccharide moiety in SKM. The hydrolyzed products are labelled as F1/2/3/4. **B.** HR-MS of the partial hydrolysis product of SKM. Unhydrolyzed SKM mass signals are shown in red font, the hydrolyzed products are shown in bold font.

**
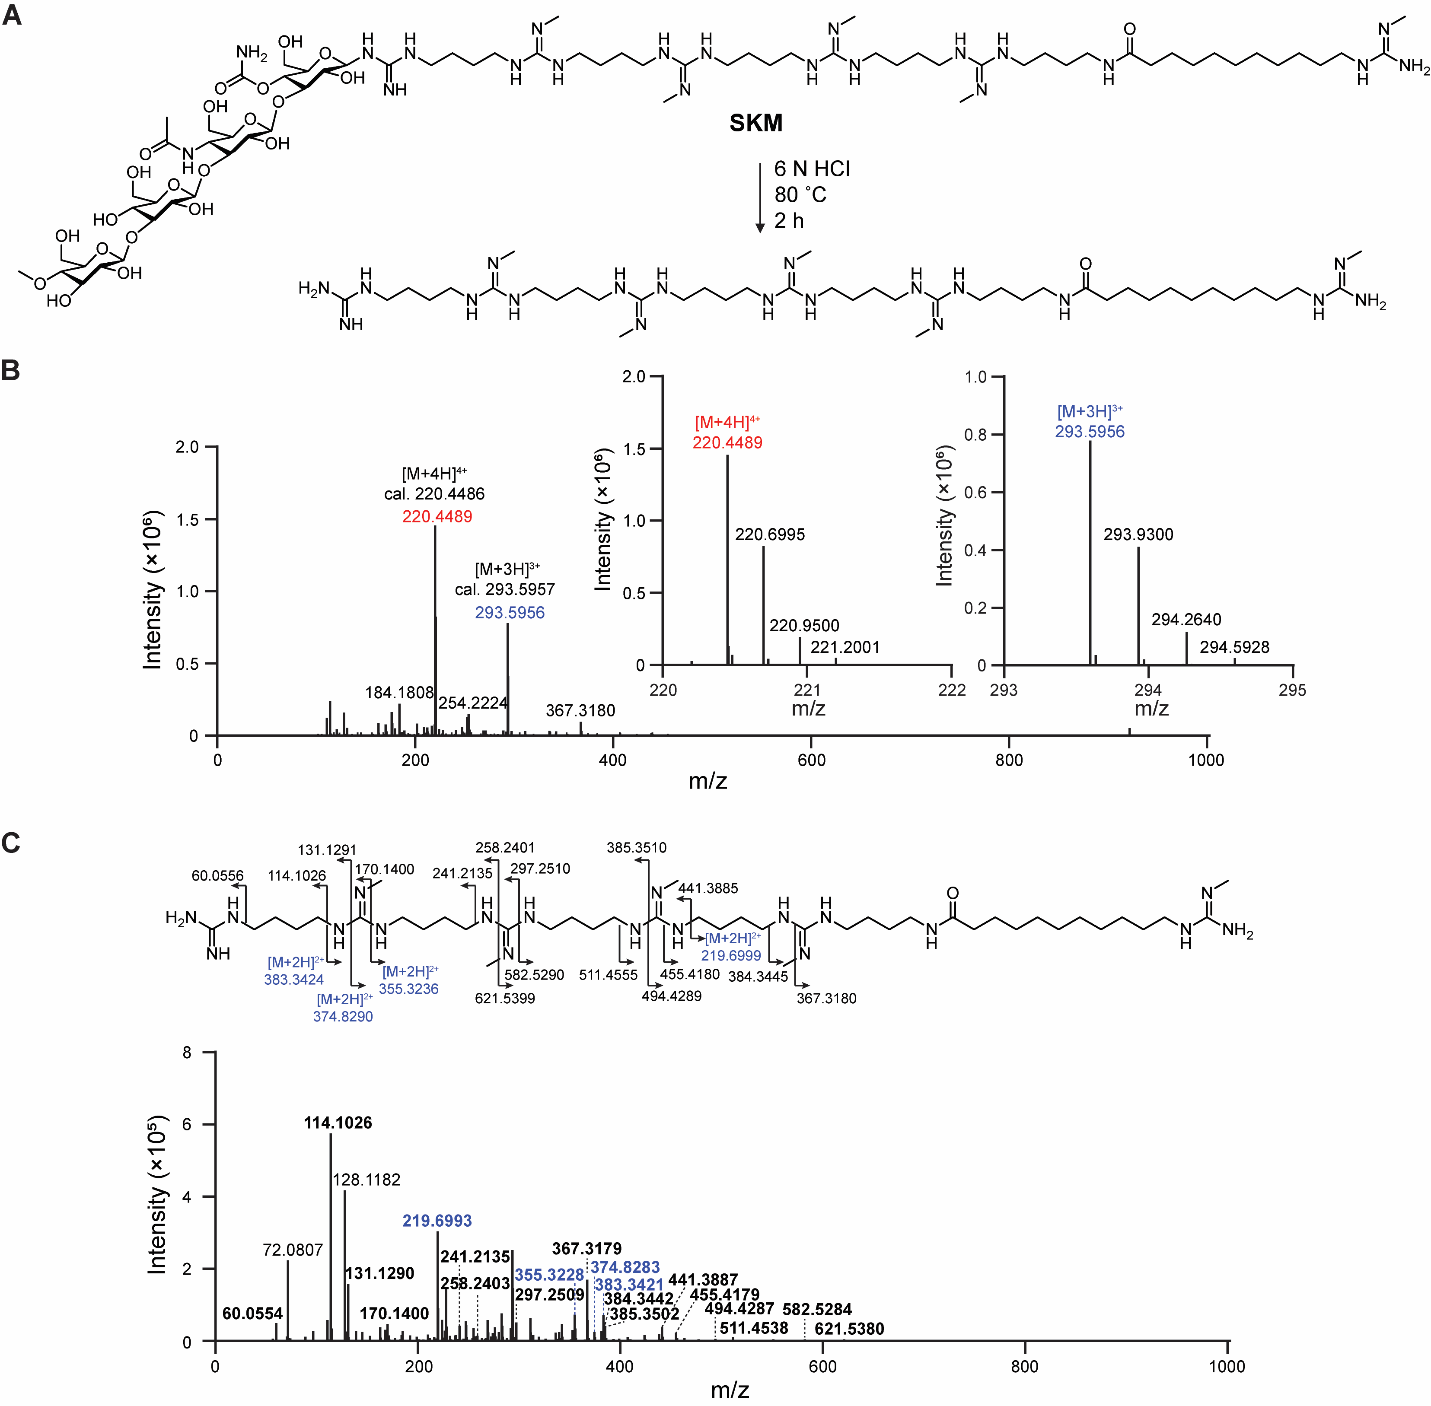
**

**Figure S11. Characterization of the polyguanidino moiety of SKM through partial hydrolysis. A.** Scheme of the partial hydrolysis of SKM to release the polyguanidino lipid tail. **B.** HR-MS spectrum of the polyguanidino lipid tail. Observed triple-/tetra- protonated mass signals are indicated. **C.** HR-ESI-QTOF MS/MS characterization of the polyguanidino lipid tail. Predicted product ions are labelled. Predicted doubly charged product ions are shown in blue font. Observed product ions are shown in bold font and blue bold font (doubly charged product ions).

**
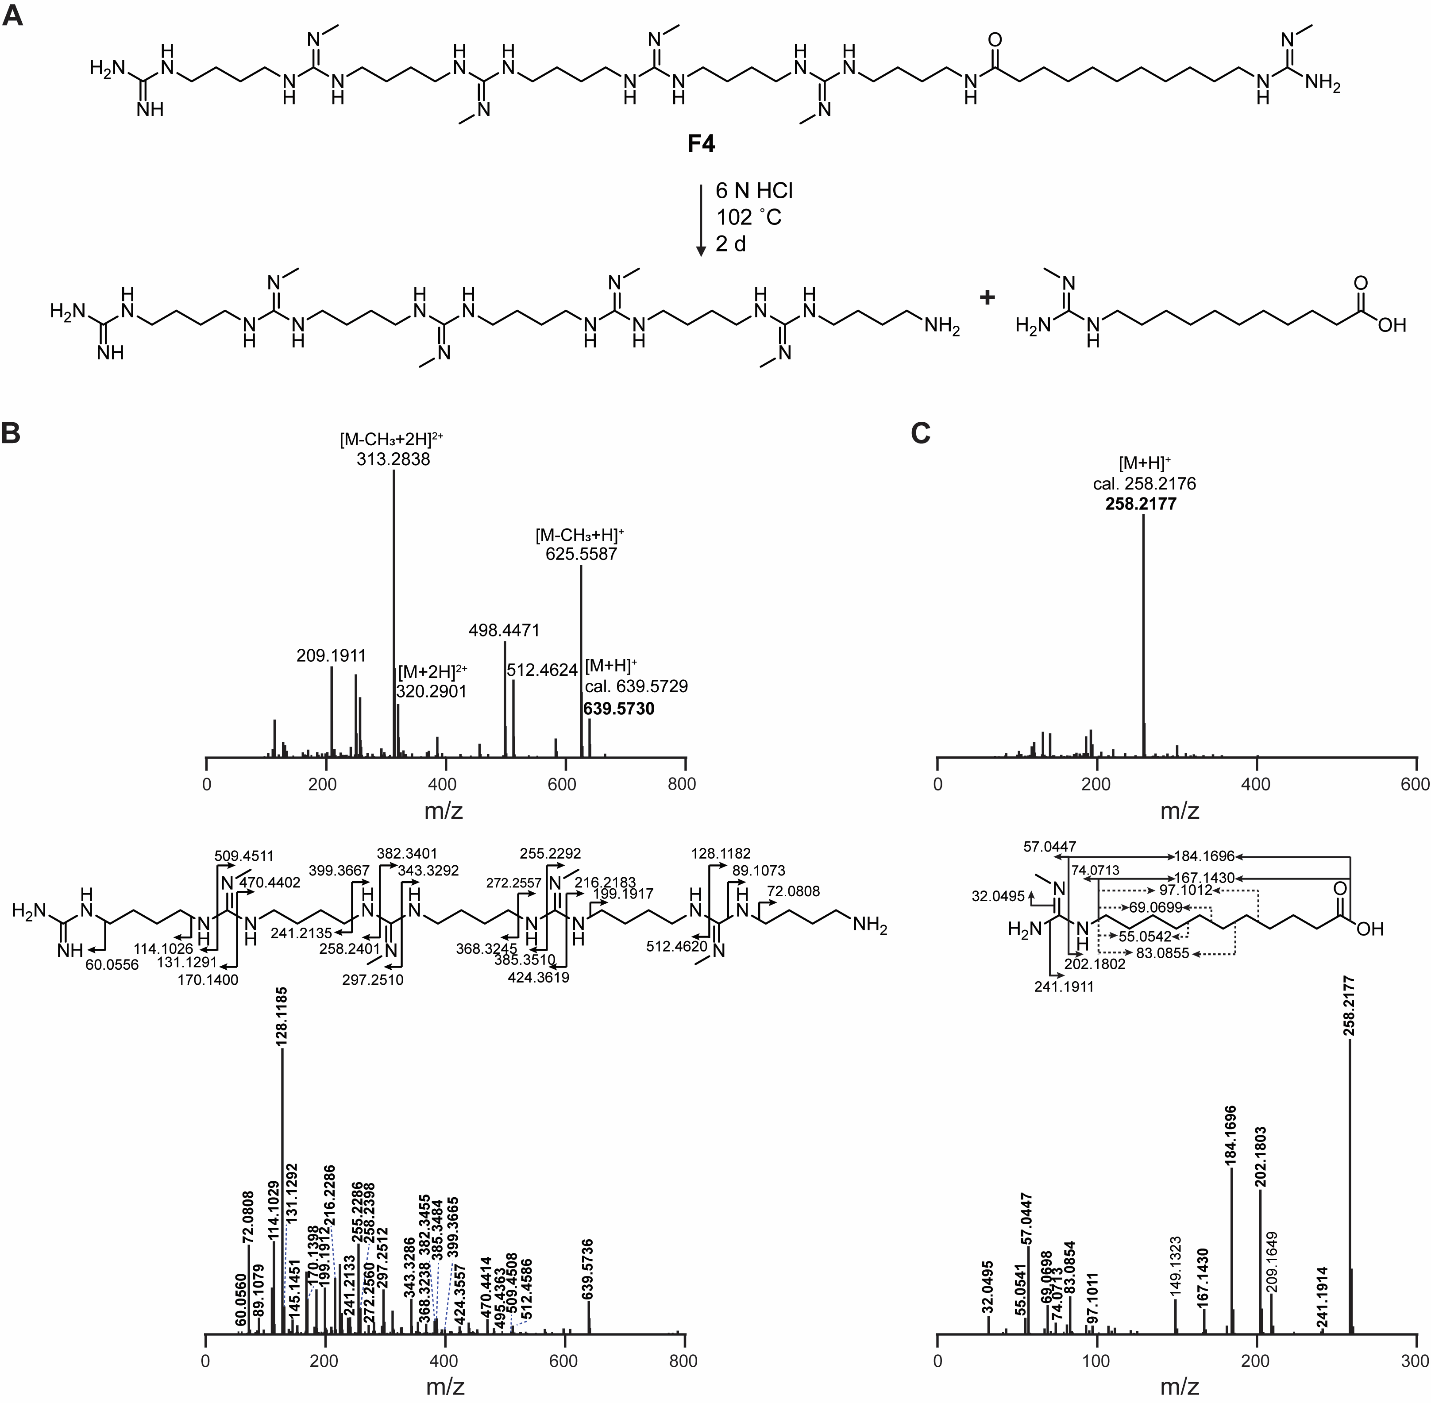
**

**Figure S12. Characterization of the polymethylagmatine and terminal 11-(2-methylguanidino) undecanoic acid through complete hydrolysis. A.** Scheme of complete hydrolysis of tail of SKM (F4 in Fig. S10A) to release the polymethylagmatine group and 11-(2-methylguanidino) undecanoic acid. **B.** HR-MS and MS/MS spectra of polymethylagmatine group. Predicted product ions are labelled and the corresponding observed product ions are shown in bold font. **C.** HR-MS and MS/MS spectra of 11-(2-methylguanidino) undecanoic acid. Predicted product ions are labelled, and the corresponding observed product ions are shown in bold font. Given the difficulty in predicting the fragmentation of the aliphatic carbon chain, the putative fragmentation patterns of the observed acyl chains are indicated with dashed lines.

**
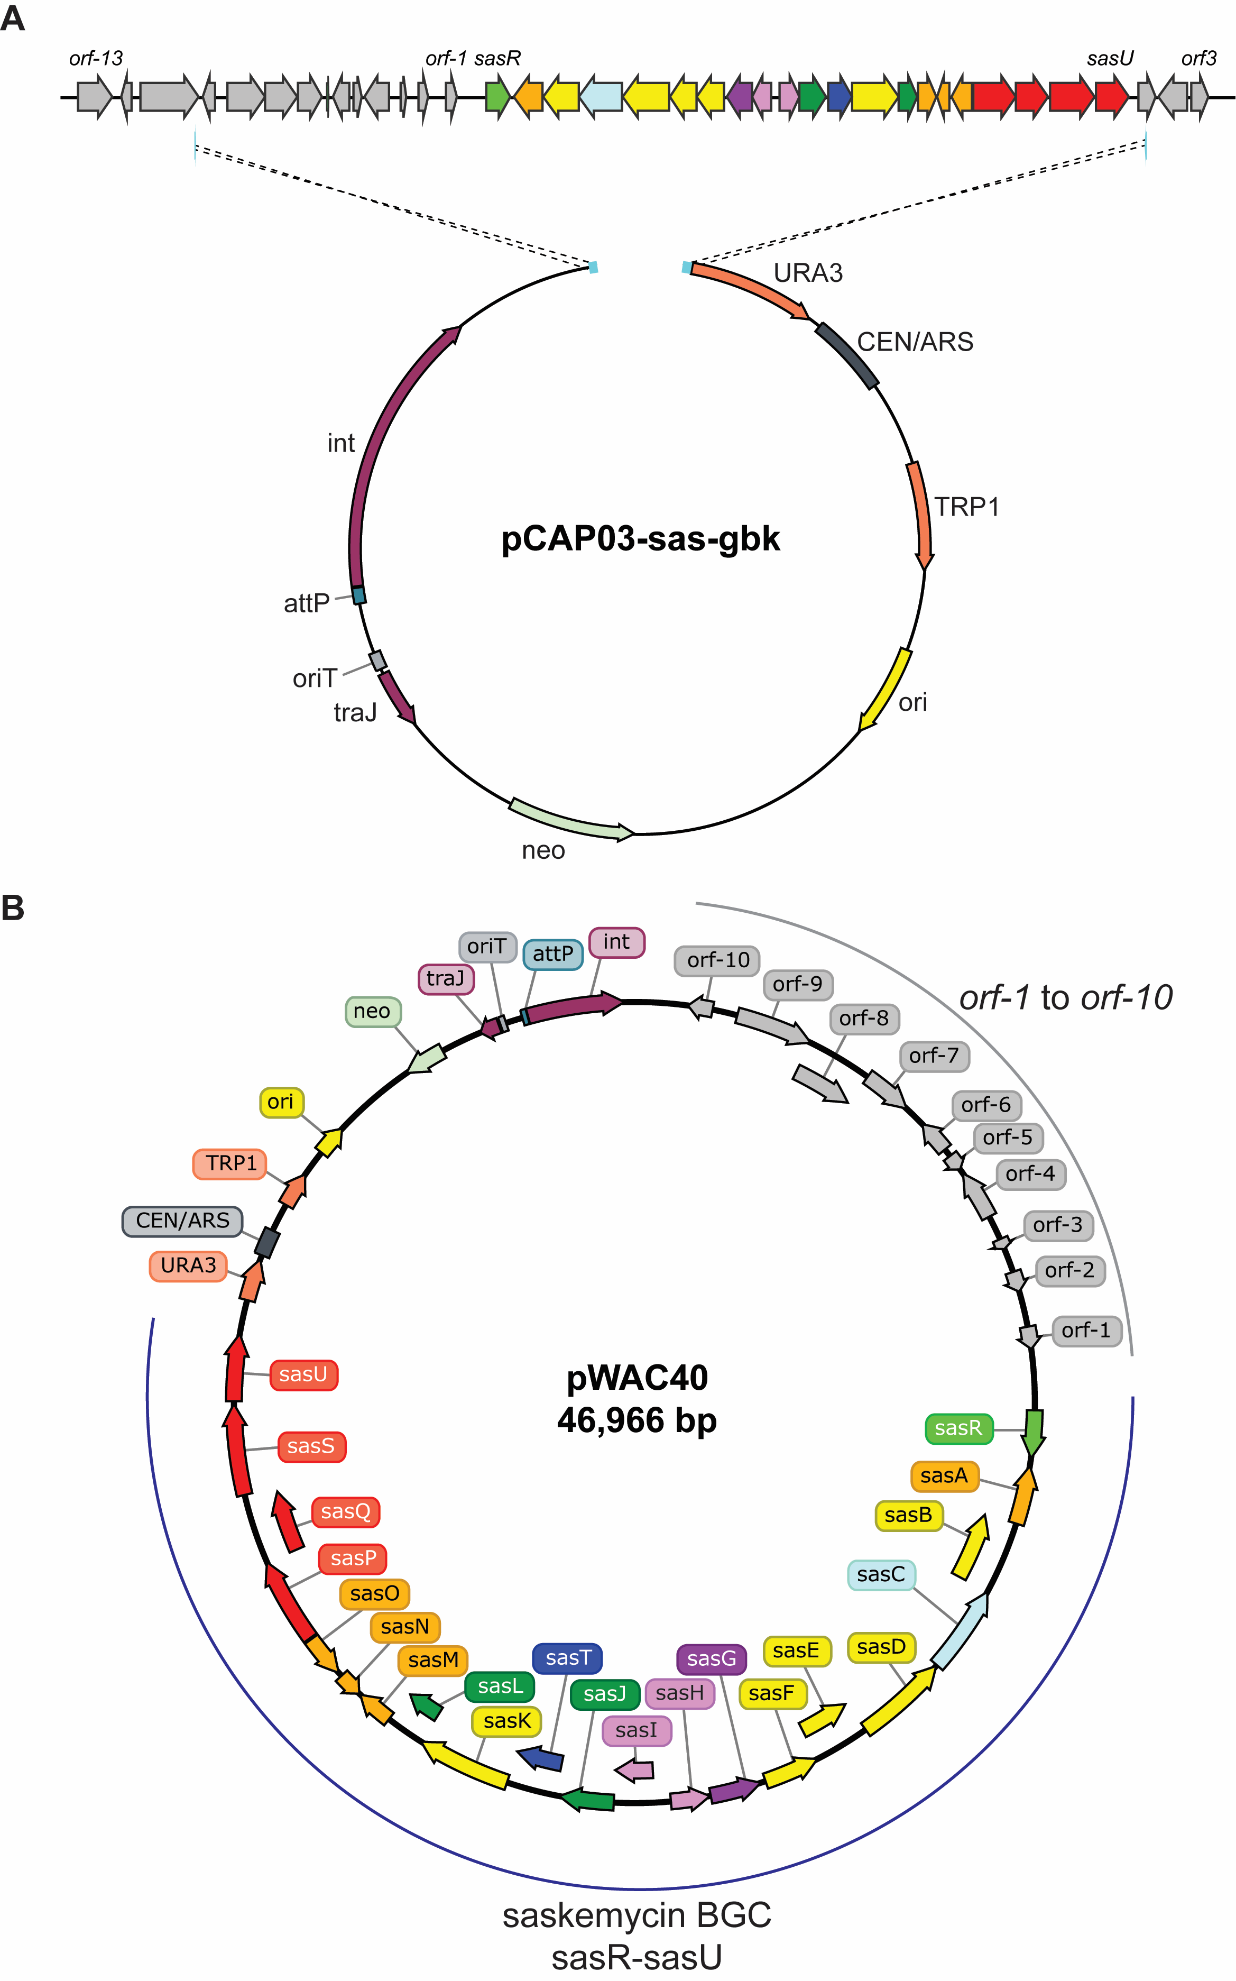
**

**Figure S13. Cloning of SKM BGC. A.** Scheme for the capture of the SKM (*sas*) BGC through transformation associated recombination (TAR)cloning in yeast. **B.** pWAC40 plasmid bearing *sas* BGC.


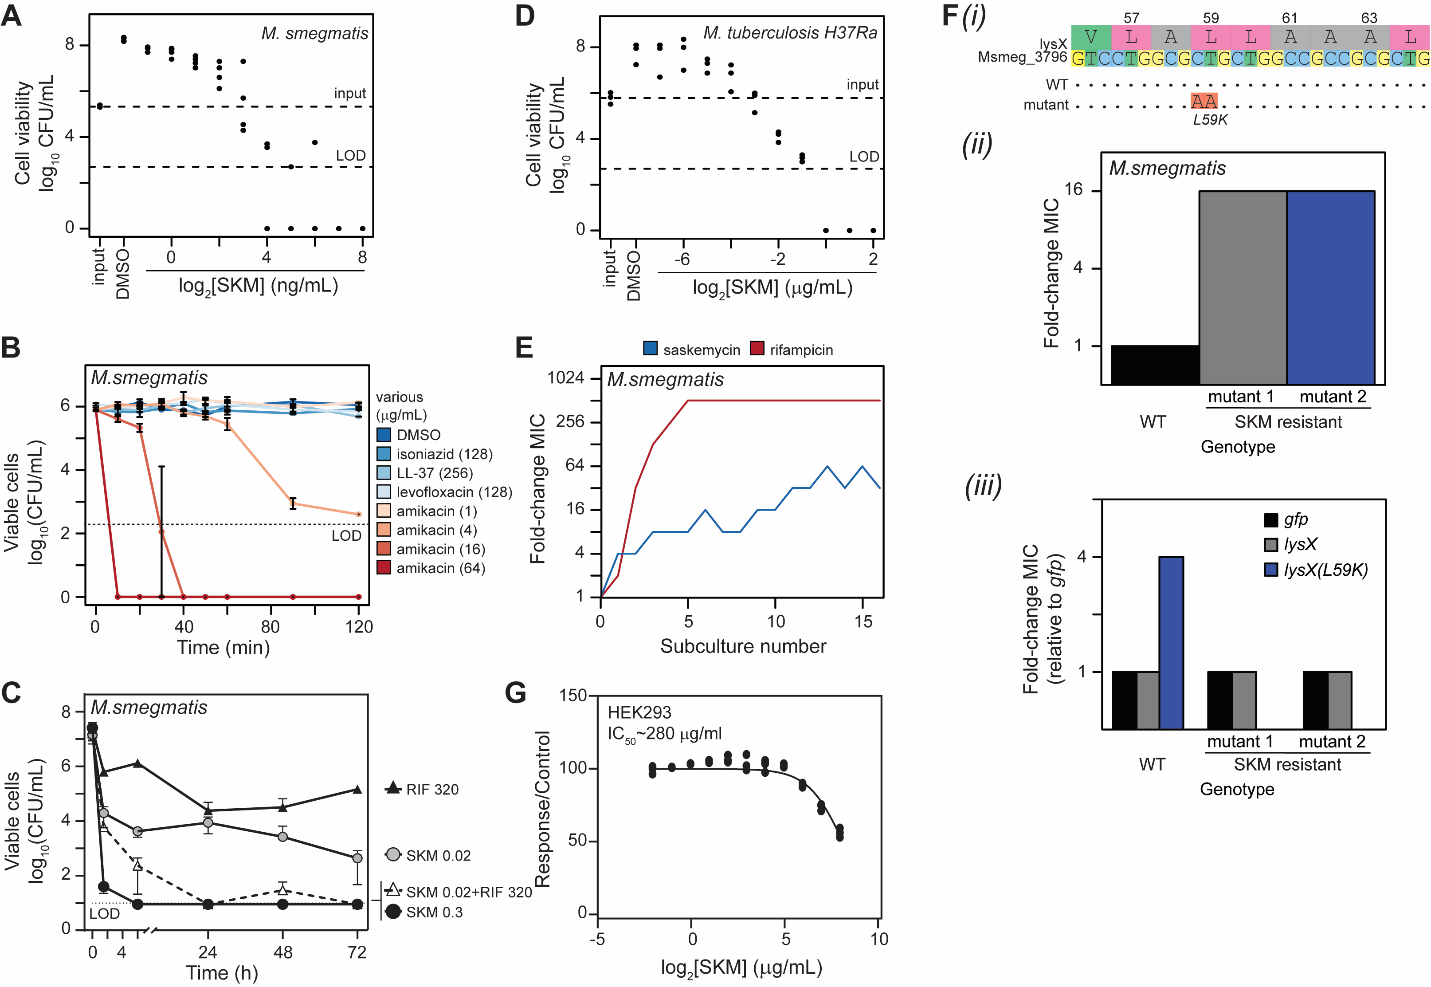


**Figure S14. SKM is a selective and bactericidal antimycobacterial compound, with rare indirect resistance mechanisms in *M. smegmatis***. **A.** Bactericidal activity of SKM versus *M. smegmatis*. Cultures were incubated with the indicated concentration of SKM for 2 days. Assay was performed in quadruplicate. The median CFU input and limit of detection (LOD) are indicated. **B.** Time-kill assay with control compounds in *M. smegmatis*. Points represent the average of two replicates, and error bars represent standard error. **C.** Time-kill assay with SKM singly and in combination with rifampicin in *M. smegmatis*. Points represent the average of 2-3 biological replicates, and error bars represent standard deviation. Concentrations of each compound in g/mL are indicated. **D.** Bactericidal activity of SKM versus *M. tuberculosis* H37Ra. Assay was performed in triplicate. Cultures were incubated with the indicated concentration of SKM for 7 days. The median CFU input and LOD are indicated. **E.** Development of resistance to SKM or rifampicin in serially passaged *M. smegmatis* cultures. **F.** Point mutation in *lysX* confers dominant resistance to SKM. *(i)* Sequence alignment of *lysX* genes from wt *M. smegmatis* and a resistant mutant. *(ii)* Increase in SKM MIC for the *lysX*(L59K) mutant of *M.smegmatis* relative to wt. *(iii)* Complementation of the *lysX*(L59K) mutant of *M. smegmatis* with subcloned wt *lysX* does not restore sensitivity to SKM. Fold-change in MIC is shown relative to each respective strain expressing *gfp*. **G.** Viability of HEK293 cells treated with varying concentrations of SKM. Assay was performed in triplicate. Line represents a non-linear fit of a 4-parameter logistic constrained to a maximum response of 1 and minimum response of 0.


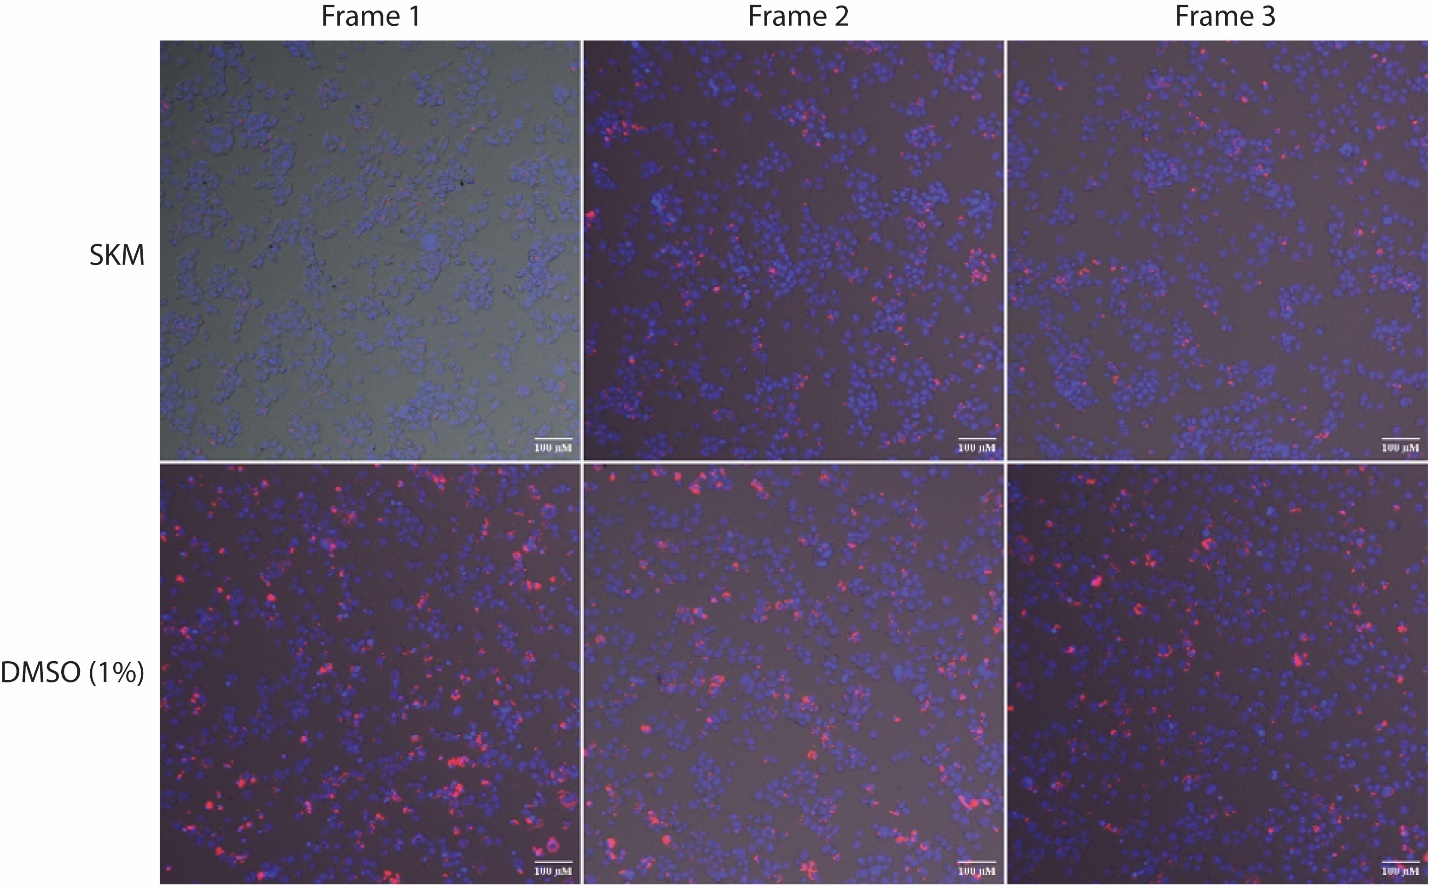


**Figure S15.** **SKM intracellular activity in *Mtb*-infected THP-1 macrophages.** Macrophages infected with RFP-expressing Mtb were treated with liposome-formulated SKM (16 µg/mL) and incubated for 72 hours. The cells were then fixed with 4% PFA in PBS, stained with DAPI, and intracellular *Mtb* load was quantified using CellInsight CX5 (ThermoFisher Scientific) High Content platform. Images were collected in the DIC, DAPI (for NucBlue fluorescence of the nuclear stain), and RFP (for bacterial dTomato fluorescence) channels. Images are representatives taken from three fields for SKM treated and the vehicle control (DMSO, 1%). Magnifications are 10×. Scale bars = 100 μm.

**
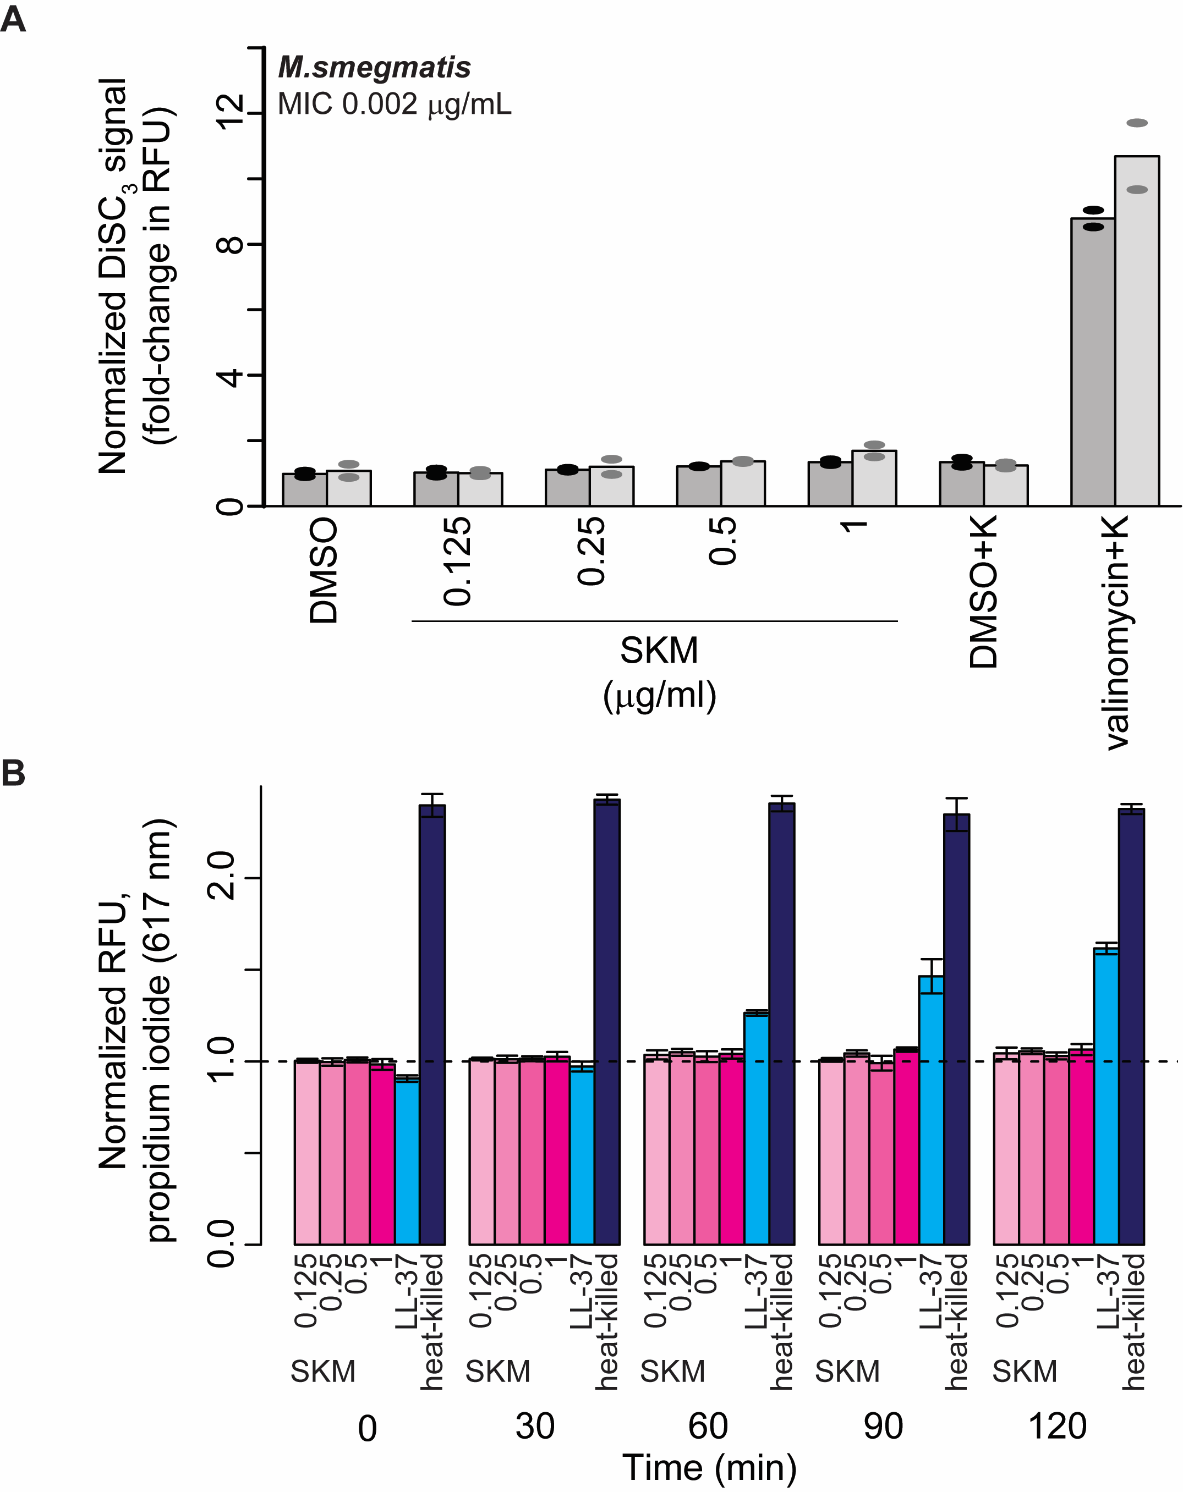
**

**Figure S16. Membrane effects of SKM. A.** Relative effects on membrane potential of *M. smegmatis* treated with SKM as determined using the voltage-sensitive dye DiSC3(5). Bar graphs represent mean of duplicate experiments, normalized to DMSO controls. Individual data points are plotted. Valinomycin (20 M) in the presence of 50 mM KCl was included as a positive control. **B.** SKM treatment of *M. smegmatis* does not lead to propidium iodide uptake. Normalized relative fluorescence units (RFUs), relative to DMSO controls, are shown for various SKM concentrations (g/mL), LL-37 (256 g/mL), and heat killed *M. smegmatis* cells. Error bars represent standard deviation and bar graphs indicate mean of 3 or more replicates.


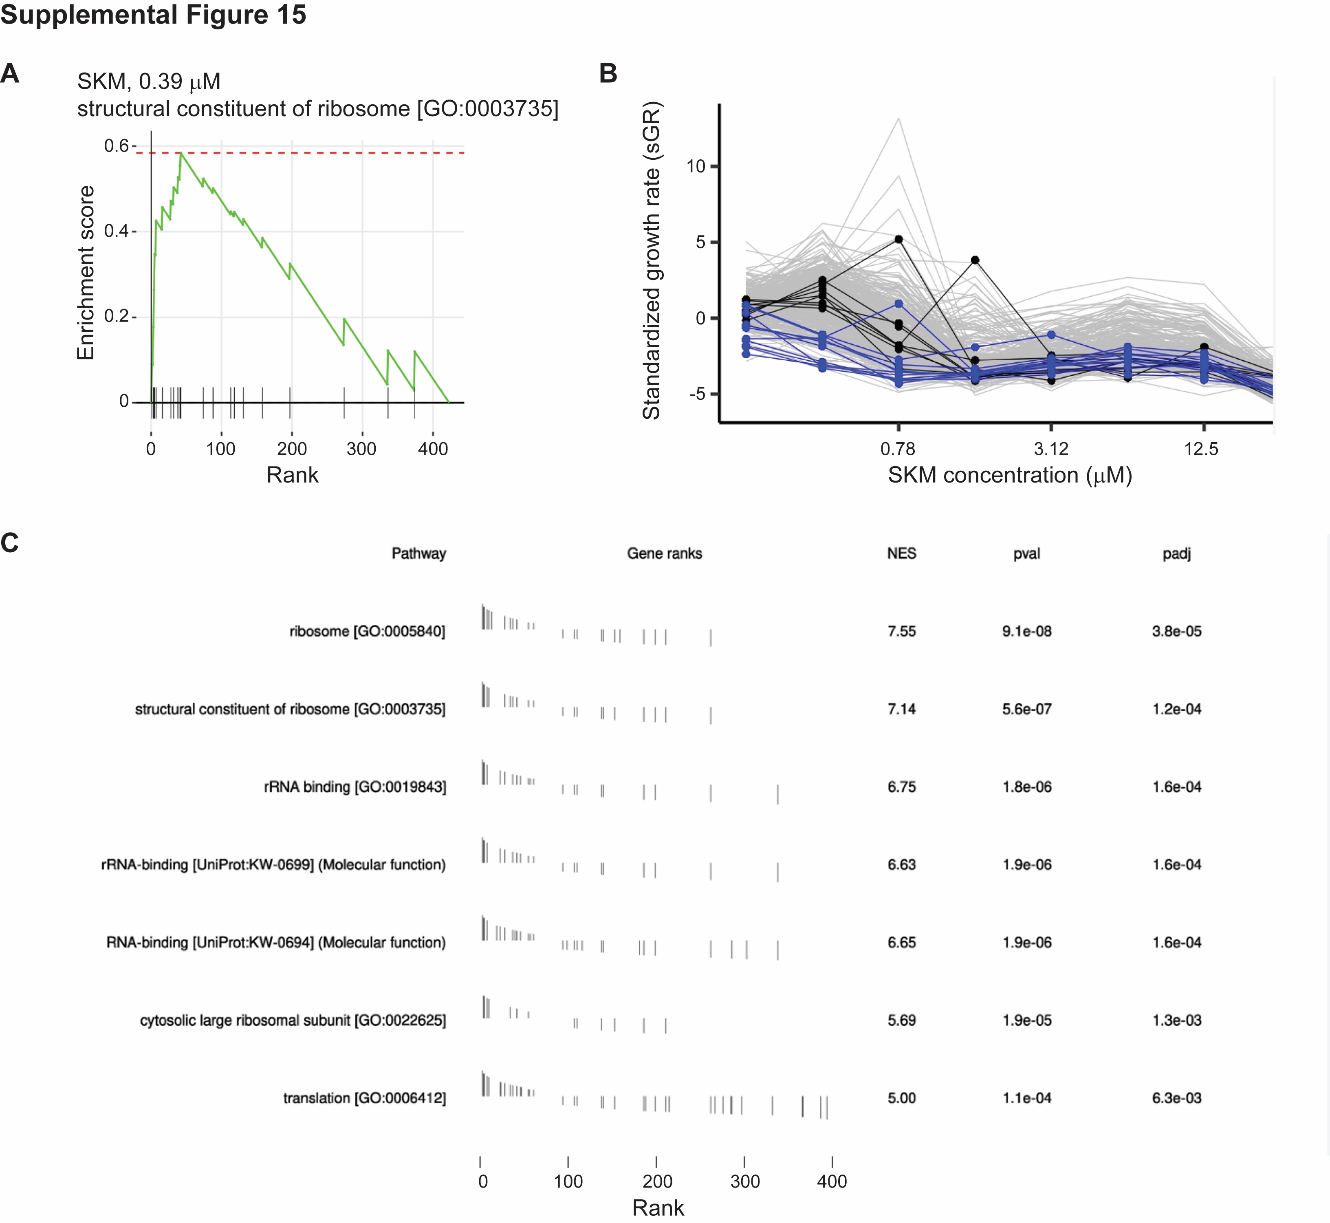


**Figure S17. PROSPECT profiling of SKM**. SKM was screened in 8-point dose-response using PROSPECT. Adapting Gene Set Enrichment Analysis1,2 (GSEA) and applying it to each dose screened, the most sensitized biological gene set in response to SKM treatment was comprised of structural constituents of ribosomes [GO:0003735]. The false discovery rate (FDR) value was 2.42E-05 at the second lowest screened dose and the harmonic mean p-value combined FDR was 1.28E-04 across all doses. **A.** Mountain plot illustrating the sensitization of hypomorphs in GO:0003735 (structural constituent of ribosome), represented as black hashes along the x-axis. The y-axis shows the cumulative enrichment score. **B.** Dose-response to SKM treatment of all hypomorphic strains in PROSPECT, with 11 leading edge hypomorph strains from the data shown in **A** highlighted in blue (*rplC, rplJ, rplD, rplP, rplE, rpsG, rpmC, rpsQ, rpmA, rplV, rplM*). WT controls are highlighted in black, and all other hypomorphs are shown in grey. **C.** All significant pathways from GSEA. Several additional ribosomally-linked gene sets were also significantly enriched among sensitized strains (FDR < 0.0001 at any dose; Harmonic mean p-value combined FDR < 0.001 across all doses); these included cytosolic large ribosomal subunit [GO:0022625] and rRNA binding [GO:0019843].


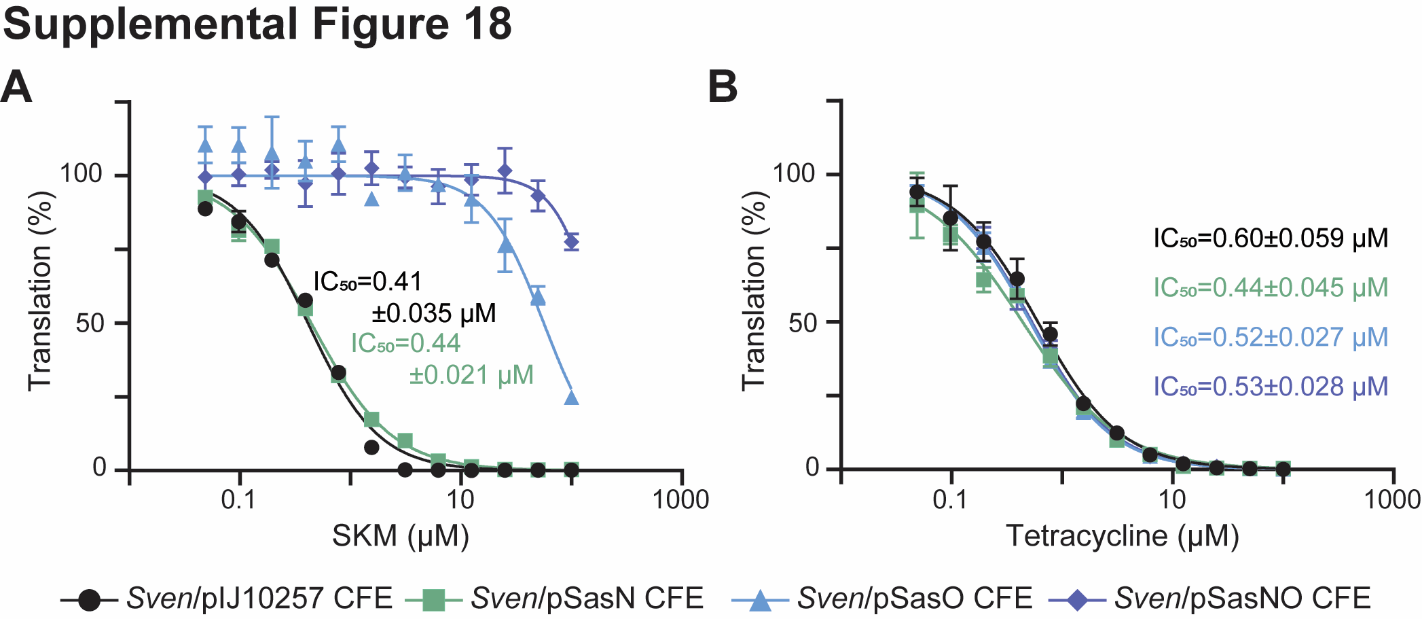


**Figure S18. Streptomyces ribosomes are sensitive to SKM in a SasO/SasN dependent manner.** Transcription/translation of mScarlet-I gene in cell-free extracts derived from *S. venezuelae* expressing one or both of SasO and SasN methyltransferases. Assays were conducted in the presence of the indicated concentrations of SKM (**A**) or tetracycline (**B**). Translation was measured in triplicate experiments; error bars represent standard deviation. mScarlet-I fluorescence value in the absence of antibiotic was set as 100%.


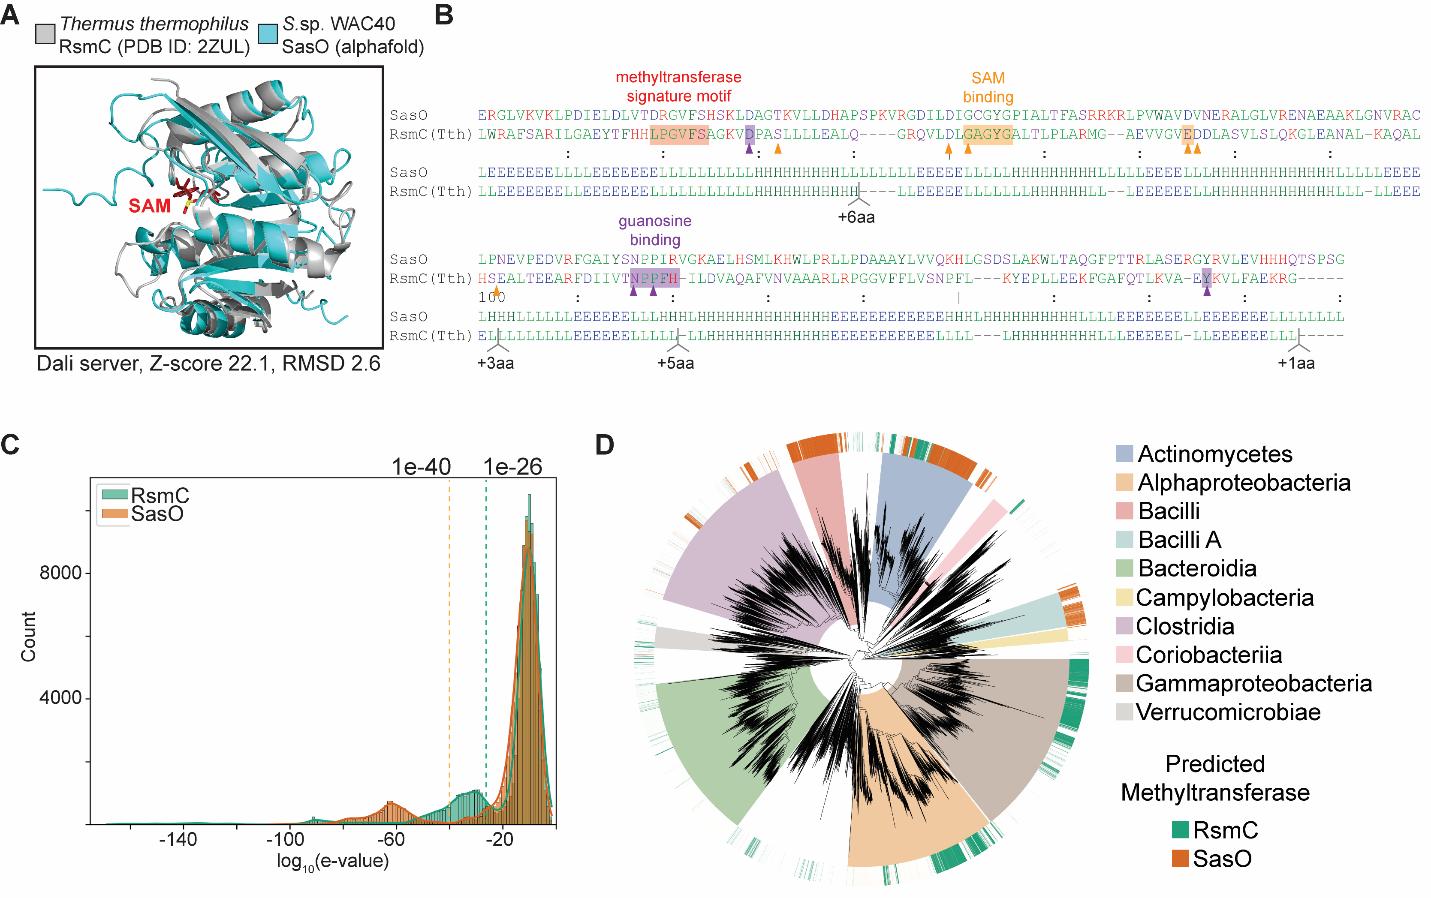


**Figure S19. SasO is similar to but distinct from RsmC. A.** Overlay of the structure of RsmC from *Thermus thermophilus* (PDB ID: 2ZUL) with AlphaFold 33 generated model of SasO from *S.* sp. WAC40. Relative fit was assessed using the DALI server4 and the overlay was generated in PyMOL5. **B.** Sequence and structure alignment between *T. thermophilus* RsmC and SasO, generated by the DALI server. The length of unaligned gaps in RsmC are indicated. Key features of RsmC are highlighted and key residues involved in S-adenosyl-methionine or guanosine binding are indicated by colored arrows. **C.** Frequency distribution of matches to SasO and RsmC in hidden Markov models (HMMs). Thresholds for defining a protein as SasO or RsmC are indicated by dashed lines. When a protein was predicted by either model, it was classified by the lowest error value. **D.** Phylogenetic tree of the distribution of SasO (orange) or RsmC (green) homologs as predicted in panel **C**.


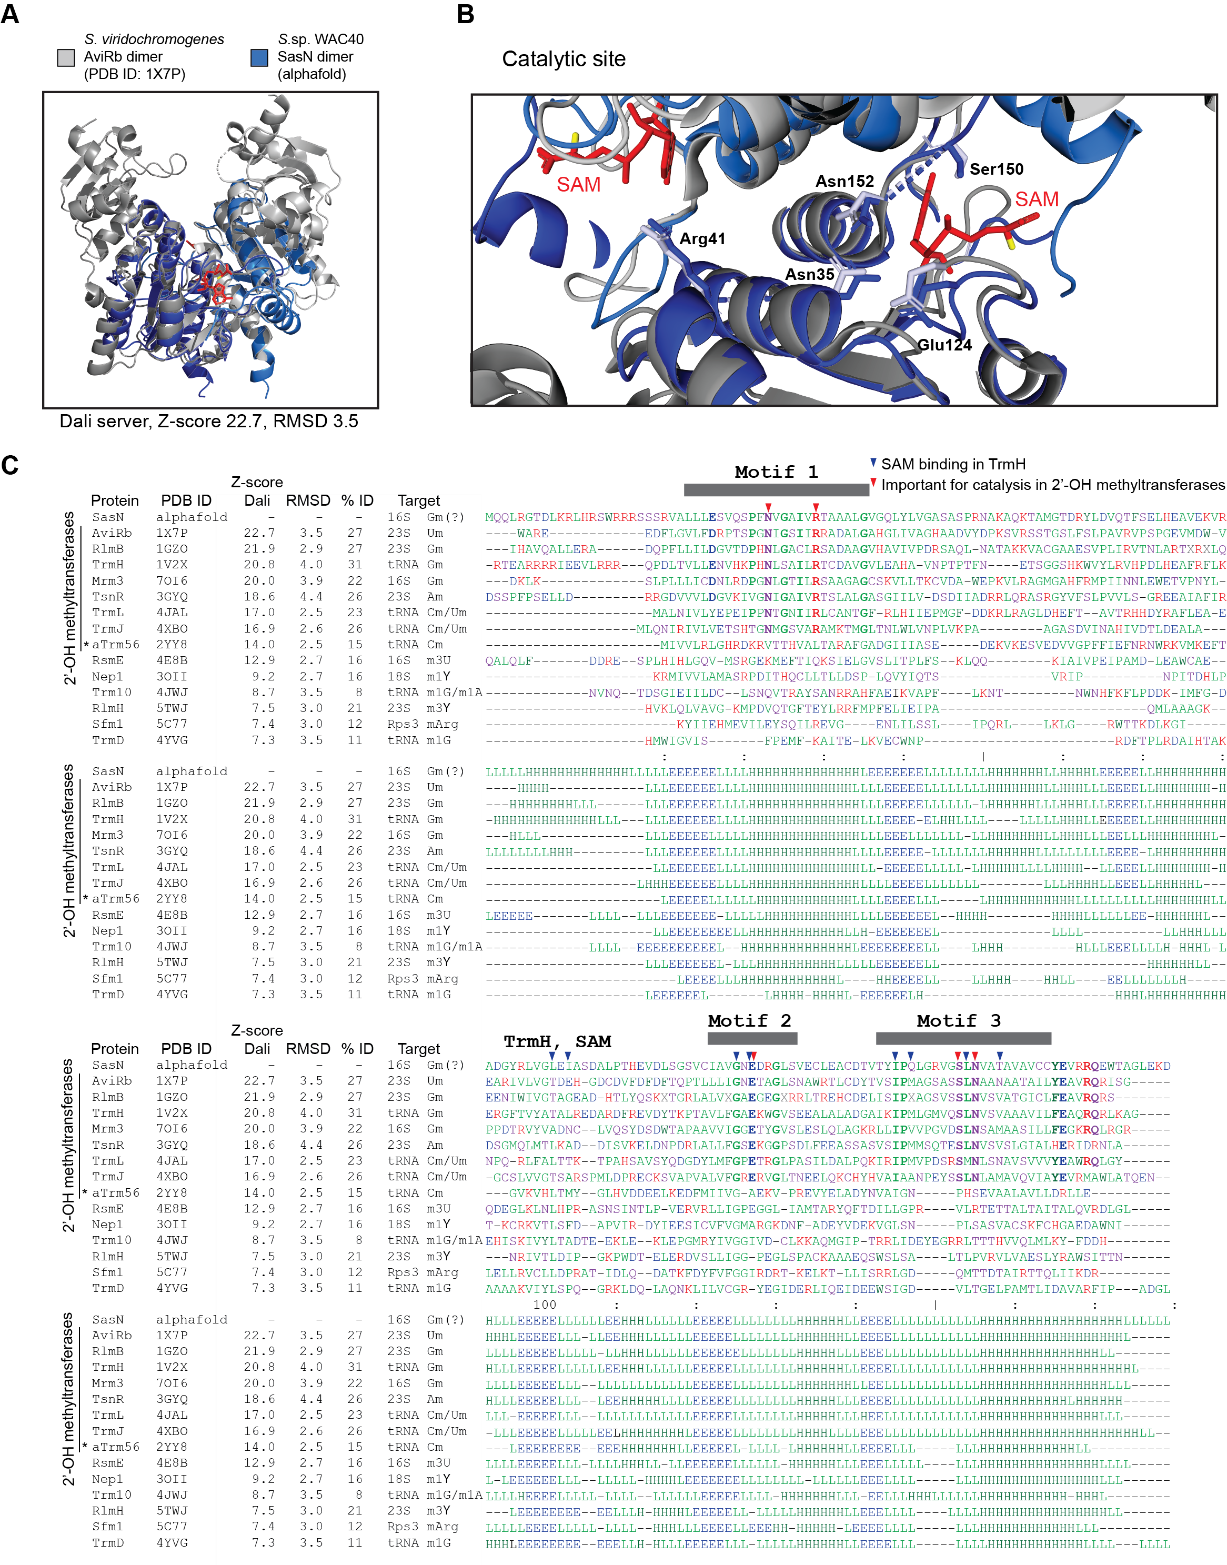


**Figure S20. SasN shares structural features with SPOUT-family 2’-OH ribose methyltransferases. A.** Overlay of the structure of dimeric AviRb (PDB ID: 1X7P) from *S. viridochromogenes* with AlphaFold 33 generated model of dimeric SasN from *S.* sp. WAC40. Relative fit was assessed using the DALI server4 and the overlay was generated in PyMOL5. **B.** Overlay of SasN with the catalytic region of AviRb. The essential residues for catalysis are indicated. **C.** Structural alignment between SasN and representative SPOUT family methyltransferases, generated by the DALI server. Key motifs and residues in TrmH SPOUT 2’-OH ribose methyltransferase are indicated.


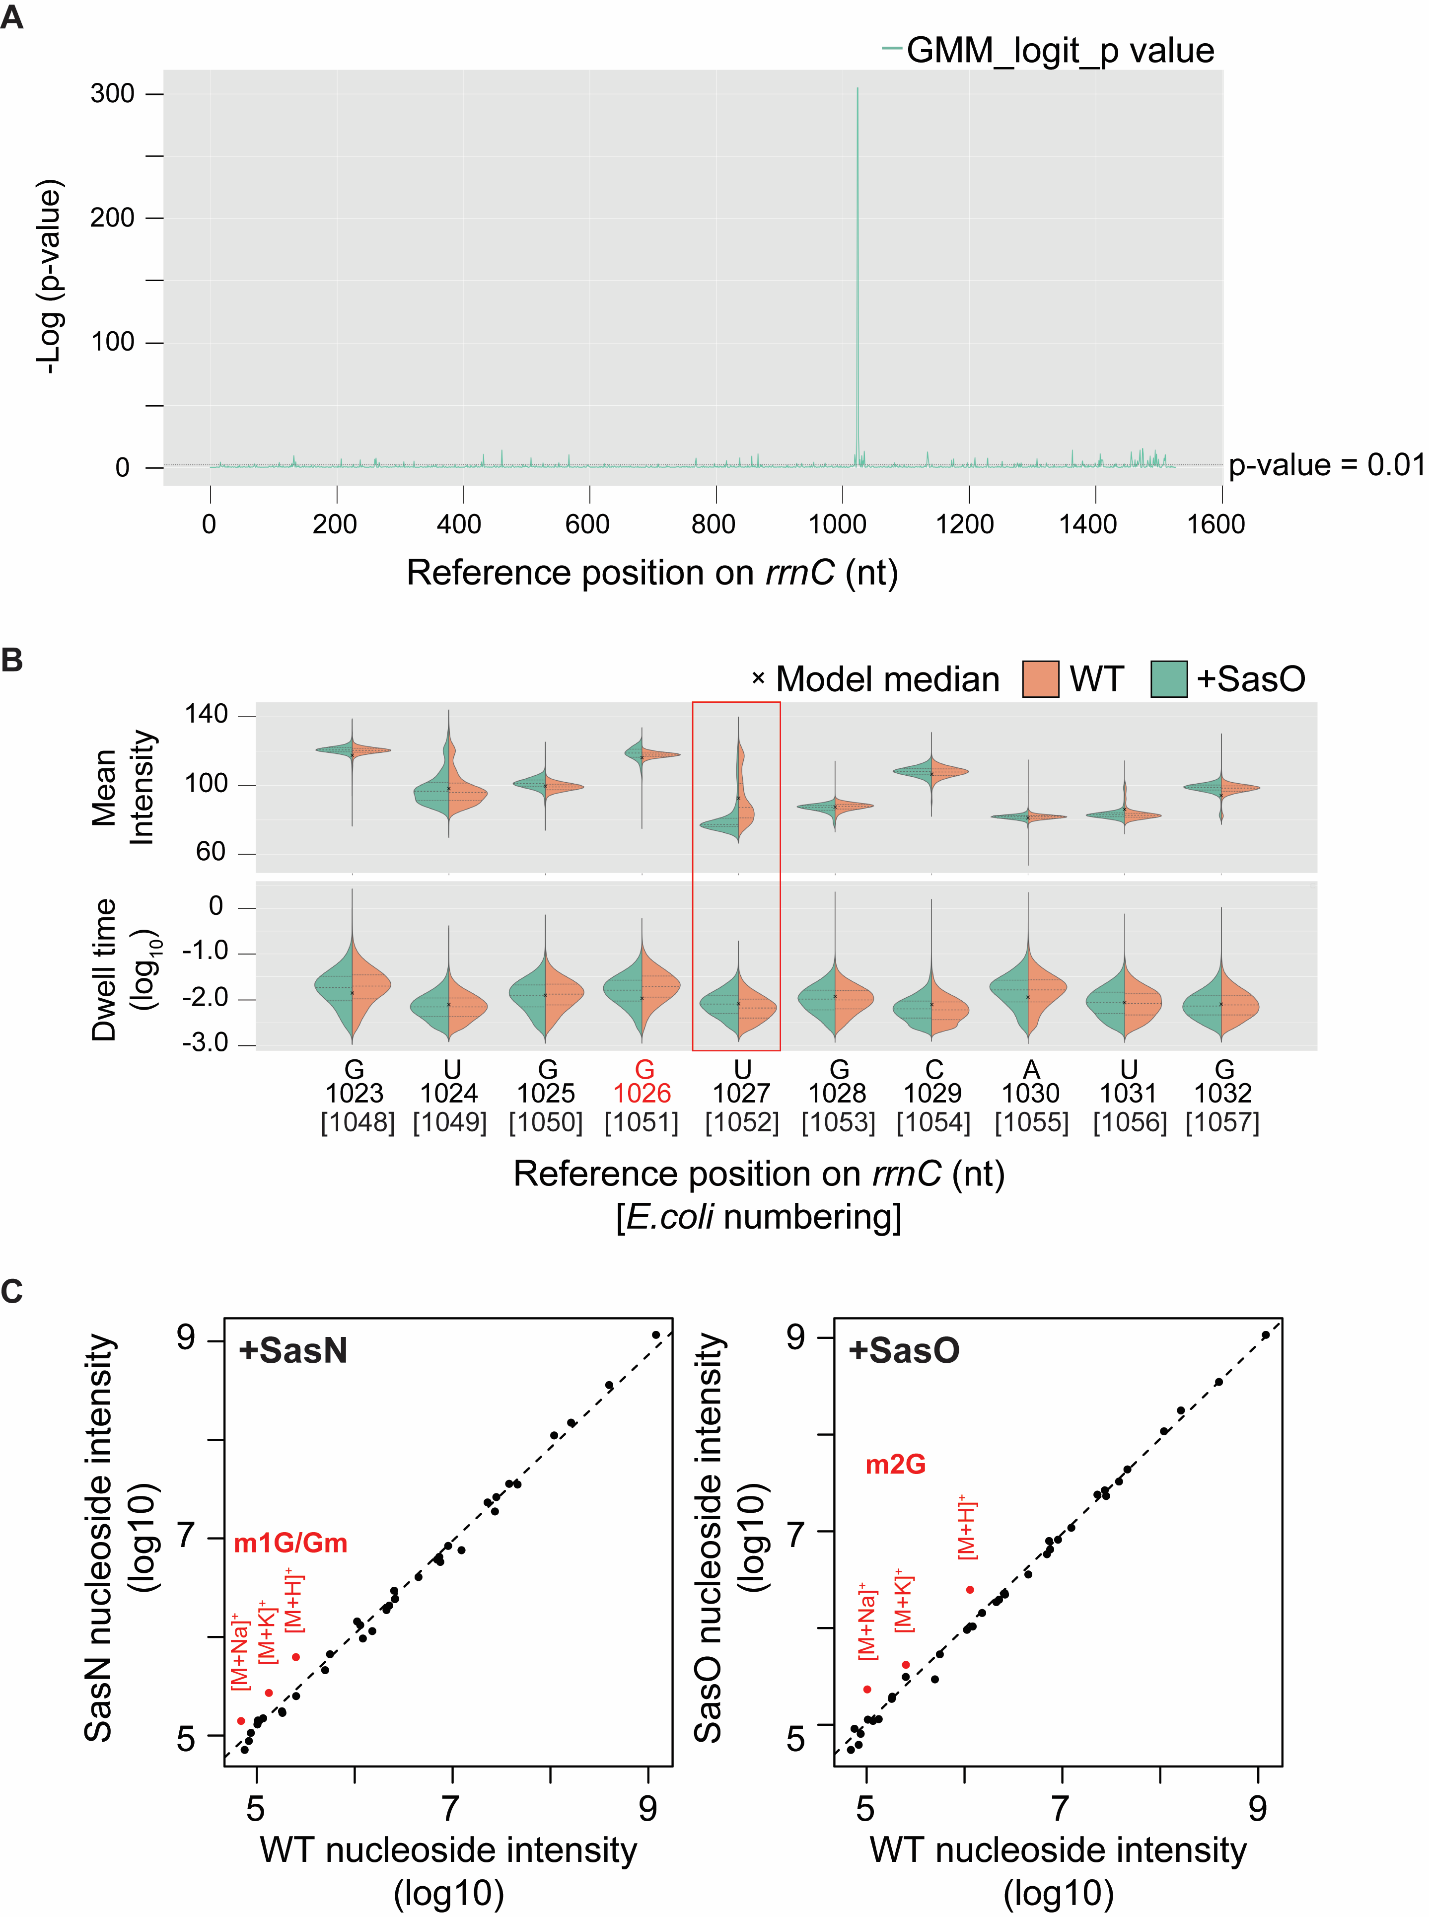


**Figure S21. SasO methylates G1026 (*E. coli* C1051) of *Streptomyces* 16S rRNA. A.** 16S rRNA from a SasO-expressing strain of *S. coelicolor* was directly sequenced using Nanopore and compared to the 16S rRNA from the wildtype strain. Nanocompore p-values determined through the GMM logit method are indicated at each position along the 16S rRNA gene *rrnC* from *S. coelicolor* A3(2) (AL645882.2) (*S. coelicolor* 16S rRNA numbering is used in panels A and B) 6-8. **B.** Mean intensity and dwell times (log10) for both the WT and SasO-expressing *S. coelicolor* strains across the region with the predicted modification. Changes in methylation status are known to affect dwell time and intensity locally within an RNA6. *E. coli* reference nucleotide positions are indicated in brackets. **C.** Semiquantitative analysis of integrated nucleoside ion intensities from nucleosides isolated from 16S rRNA derived from WT, SasN-, and SasO- expressing strains of *S. coelicolor*. Data are plotted for SasN *(left)* or SasO *(right)* on the y-axis vs WT *S. coelicolor* 16S rRNA nucleosides. Ion intensities with > 1.5-fold increase in relative signal intensity in rRNA methyltransferase expressing strains are indicated in red, annotated according to co-eluting standards. The retention times for the indicated ions for SasN matched those for both Gm and m1G standards, which could not be resolved.


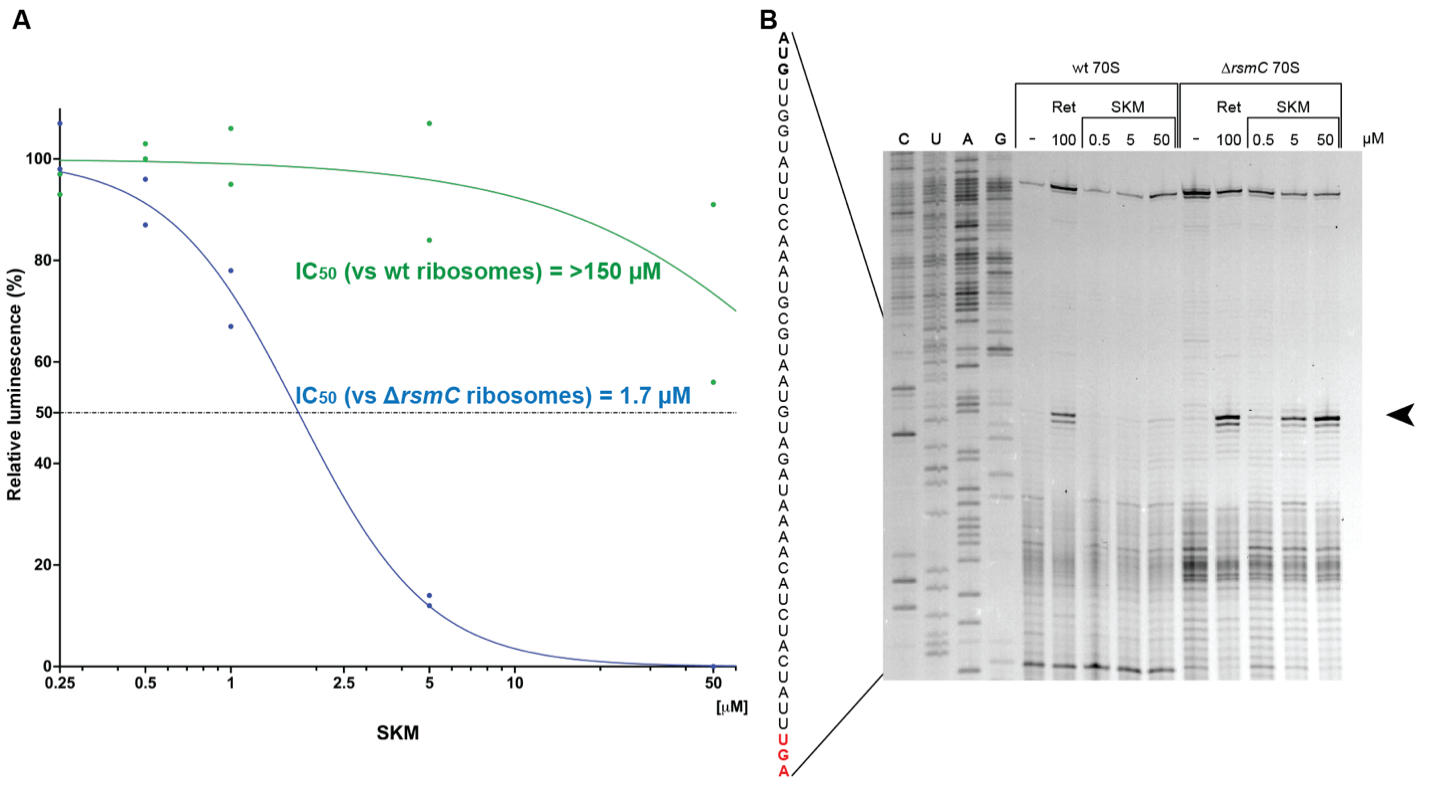


**Fig. S22. Effect of SKM on cell-free translation by ribosomes from the *E. coli* *rsmC* strain. A.** Luminescence resulting from *in vitro* translation of firefly luciferase mRNA by ribosomes isolated from WT (green line) or *rsmC* (blue line) strains in the presence of increasing concentrations of SKM. Luminescence in the absence of SKM was taken as 100%. Assays were performed in duplicate with each single measure depicted as dot. The averages were fitted to a curve utilizing least square fit function with Prism. **B.** Toeprinting assay monitoring the position of ribosomes, isolated from WT or *rsmC E. coli* strains, on an *ermBL*-mRNA in the absence of the inhibitors (“-“) or in the presence of increasing concentrations of SKM (0.5, 5 and 50 µM). Translation initiation inhibitor retapamulin (Ret), present at 100 µM, was used as a control. The black arrow indicates ribosomes stalled at the AUG initiation codon. C, U, A and G sequencing lanes are indicated. The mRNA template sequence is shown.


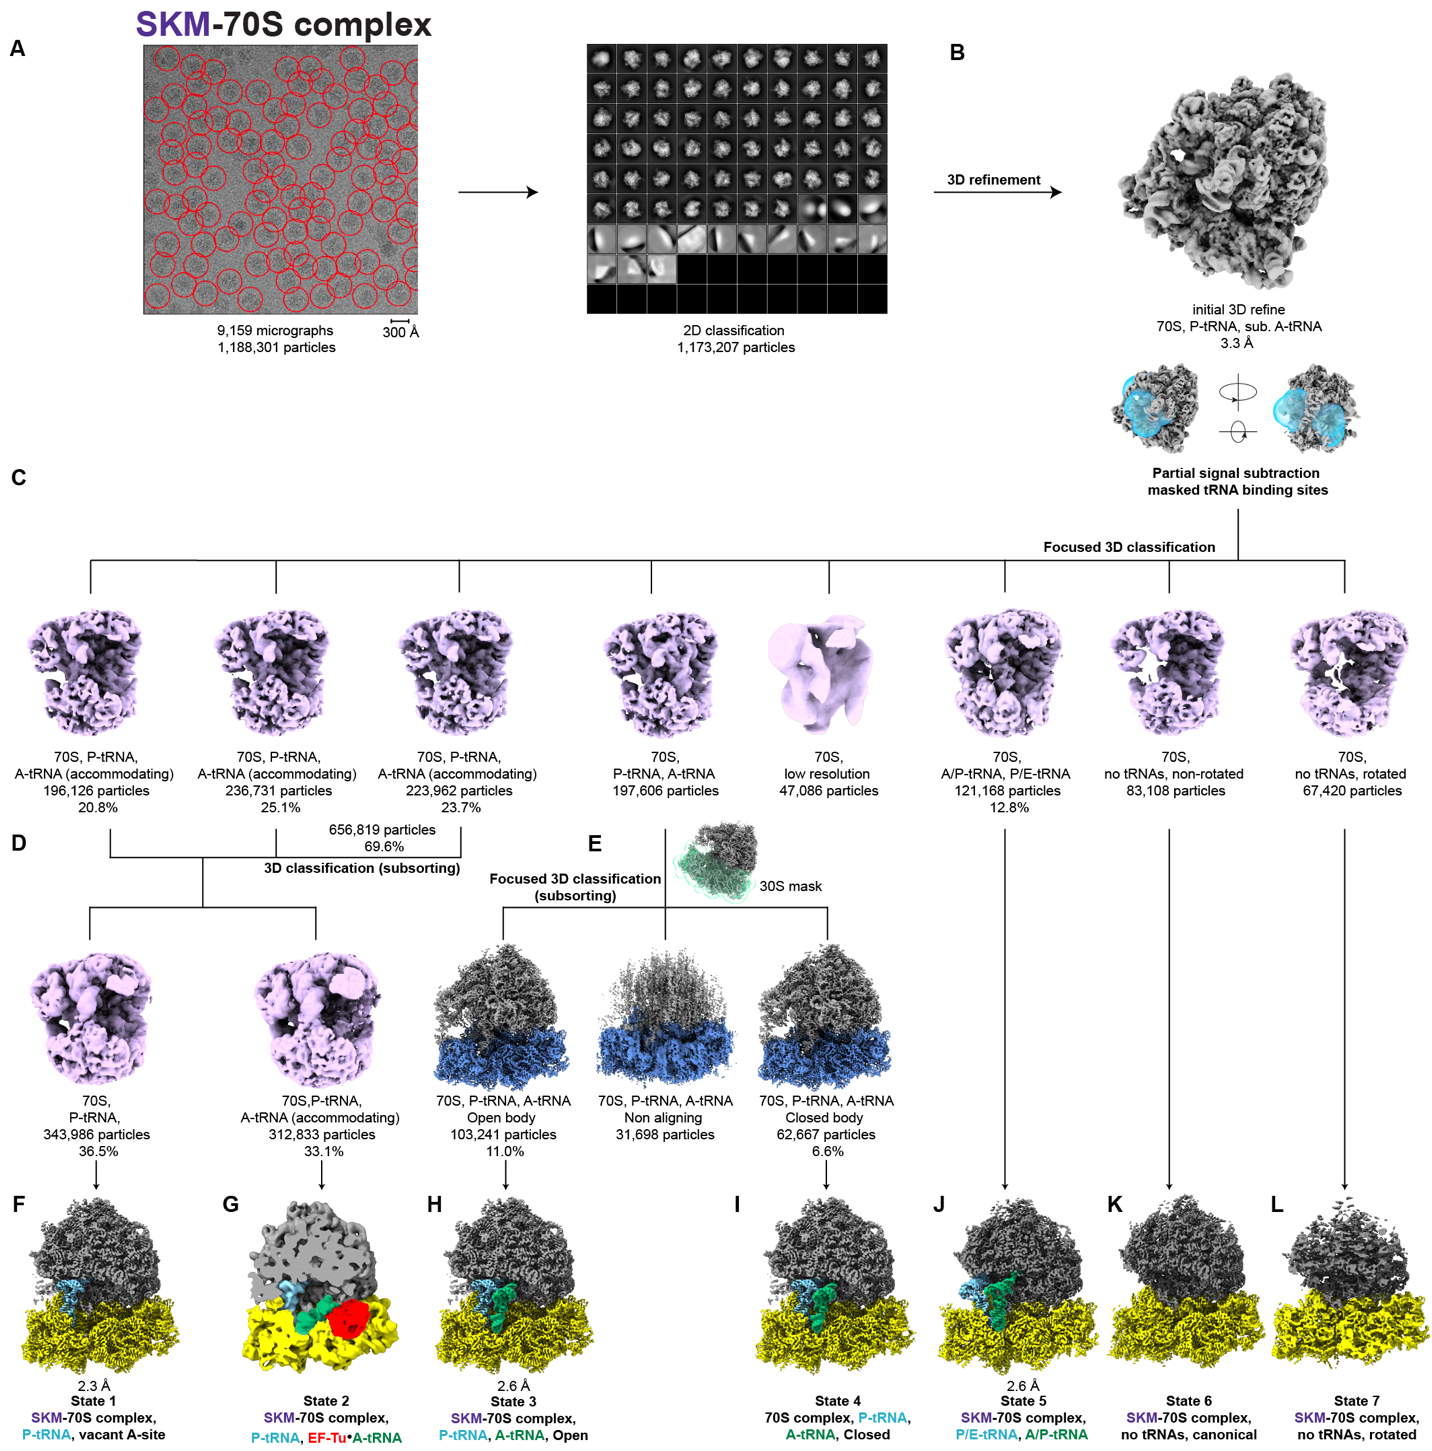


**Fig. S23. *In silico* sorting scheme of the *E. coli* 70S-SKM complex. A.** From 9,159 micrographs, 1,173,207 ribosome-like particles were selected after 2D classification, and **B.** subjected to an initial 3D refinement, and then **C.** partially subtracted with a mask surrounding the tRNA binding sites and 3D classified. This yielded 8 classes; three 70S classes with P-tRNA and accommodating A-tRNA (combined 69.6%, 656,819 particles), a non-rotated 70S class with A- and P-site tRNAs (197,606 particles), a class of low resolution 70S particles (47,086 particles), a rotated 70S class with hybrid A/P- and P/E-tRNA (12.8%, 121,168 particles), as well as rotated (67,420 particles) and non-rotated (83,108 particles) 70S classes with no tRNAs. **D.** The three 70S classes with P-tRNA and substoichiometric accommodating A-tRNA were pooled and further subsorted; 3D classification yielded two classes including a 70S class with P-tRNA and vacant A-site (36.5%, 343,986 particles) and a 70S class with P-tRNA and accommodating A-site tRNA (33.1%, 312,833 particles). **E.** The 70S class with P- and A-site tRNAs underwent further focus 3D classification, with a mask surrounding the 30S, yielding three classes, namely, a class of non-aligning 70S particles (31,698 particles) as well as 70S classes with P- and A-site tRNAs and either a closed (6.6%, 62,667 particles) or open (11.0%, 103,241 particles) body conformation. **F-L.** The subclasses were further processed to yield the final maps of States 1-7; State 1, 3 and 5 structures reached a final average resolutions (at FSC0.143) of 2.3 Å, 2.6 Å, and 2.6 Å (at FSC0.143), respectively. In **F-I**, the P-tRNA is colored cyan, **H-I**, the A-tRNA is green, **G**, the A/T-tRNA is colored green and EF-Tu in red, and in **J**, the P/E-tRNA and A/P-tRNA are colored cyan and green, respectively.


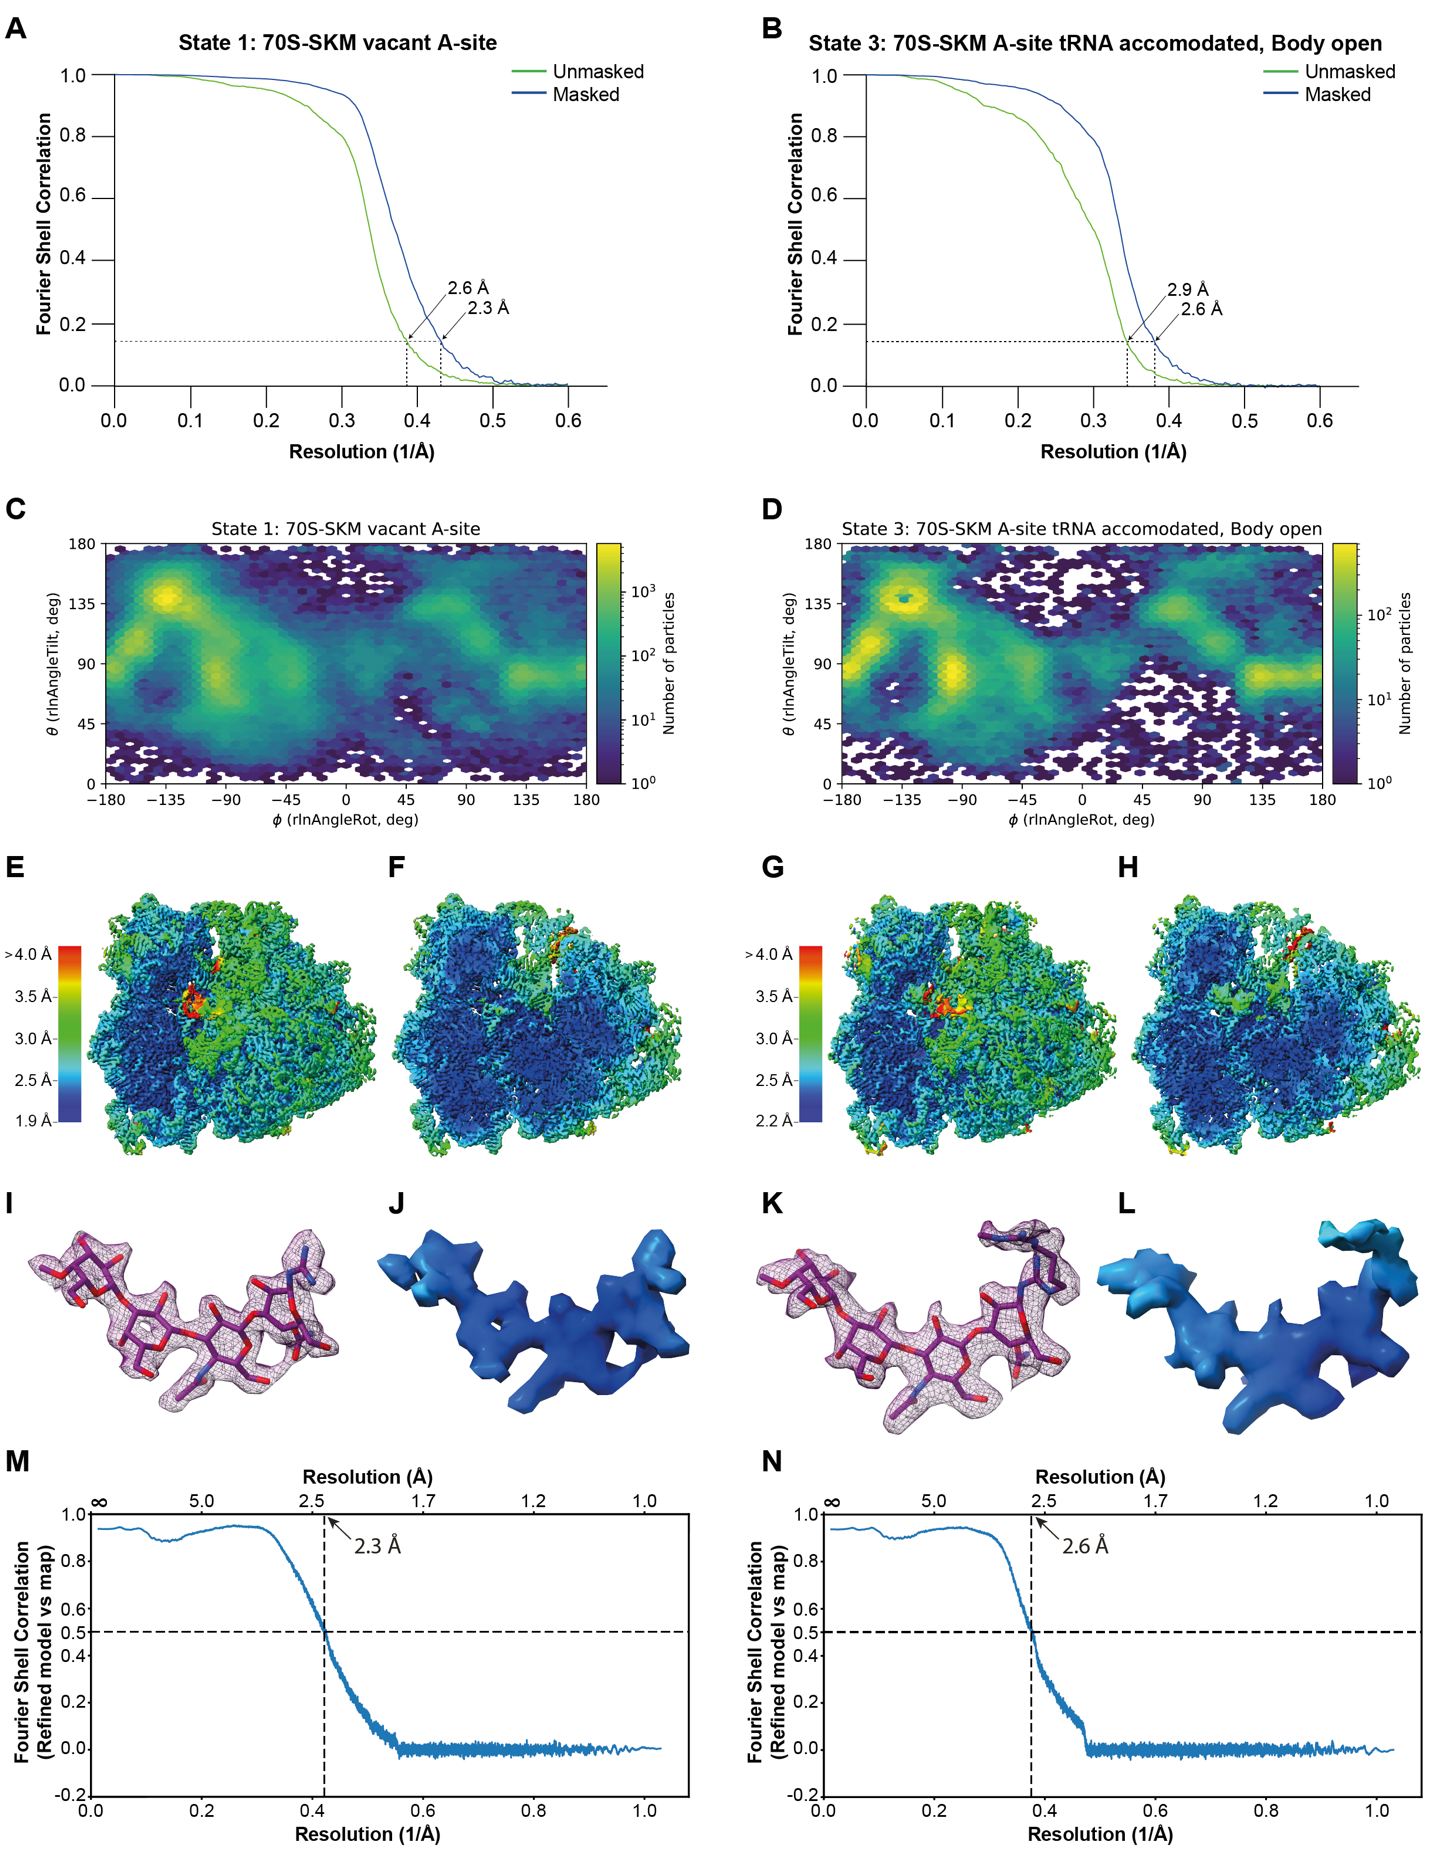


**Figure S24. Angular distribution, FSC and local resolution of the SKM-70S complexes. A-B.** Fourier shell correlation (FSC) curve and (**C-D**) Angular distribution plot of (**A,C**) State 1 (SKM-70S complex with vacant A-site) and (**B,D**) State 3 (SKM-70S complex with accommodated A-tRNA; open and unlatched), with unmasked (green) and masked (blue) FSC curves plotted against the resolution (1/Å). **E-H,** Overview and transverse section of the cryo-EM maps of the (**E,F**) State 1 and (**G,H**) State 3, colored according to local resolution. **I-L,** Molecular model of SKM and isolated cryo-EM density for SKM from (**I,J**) state 1 and (**K,L**) state 3, colored according to local resolution. **M-N,** FSC map versus model curves for (**M**) State 1 and (**N**) State 3.

**
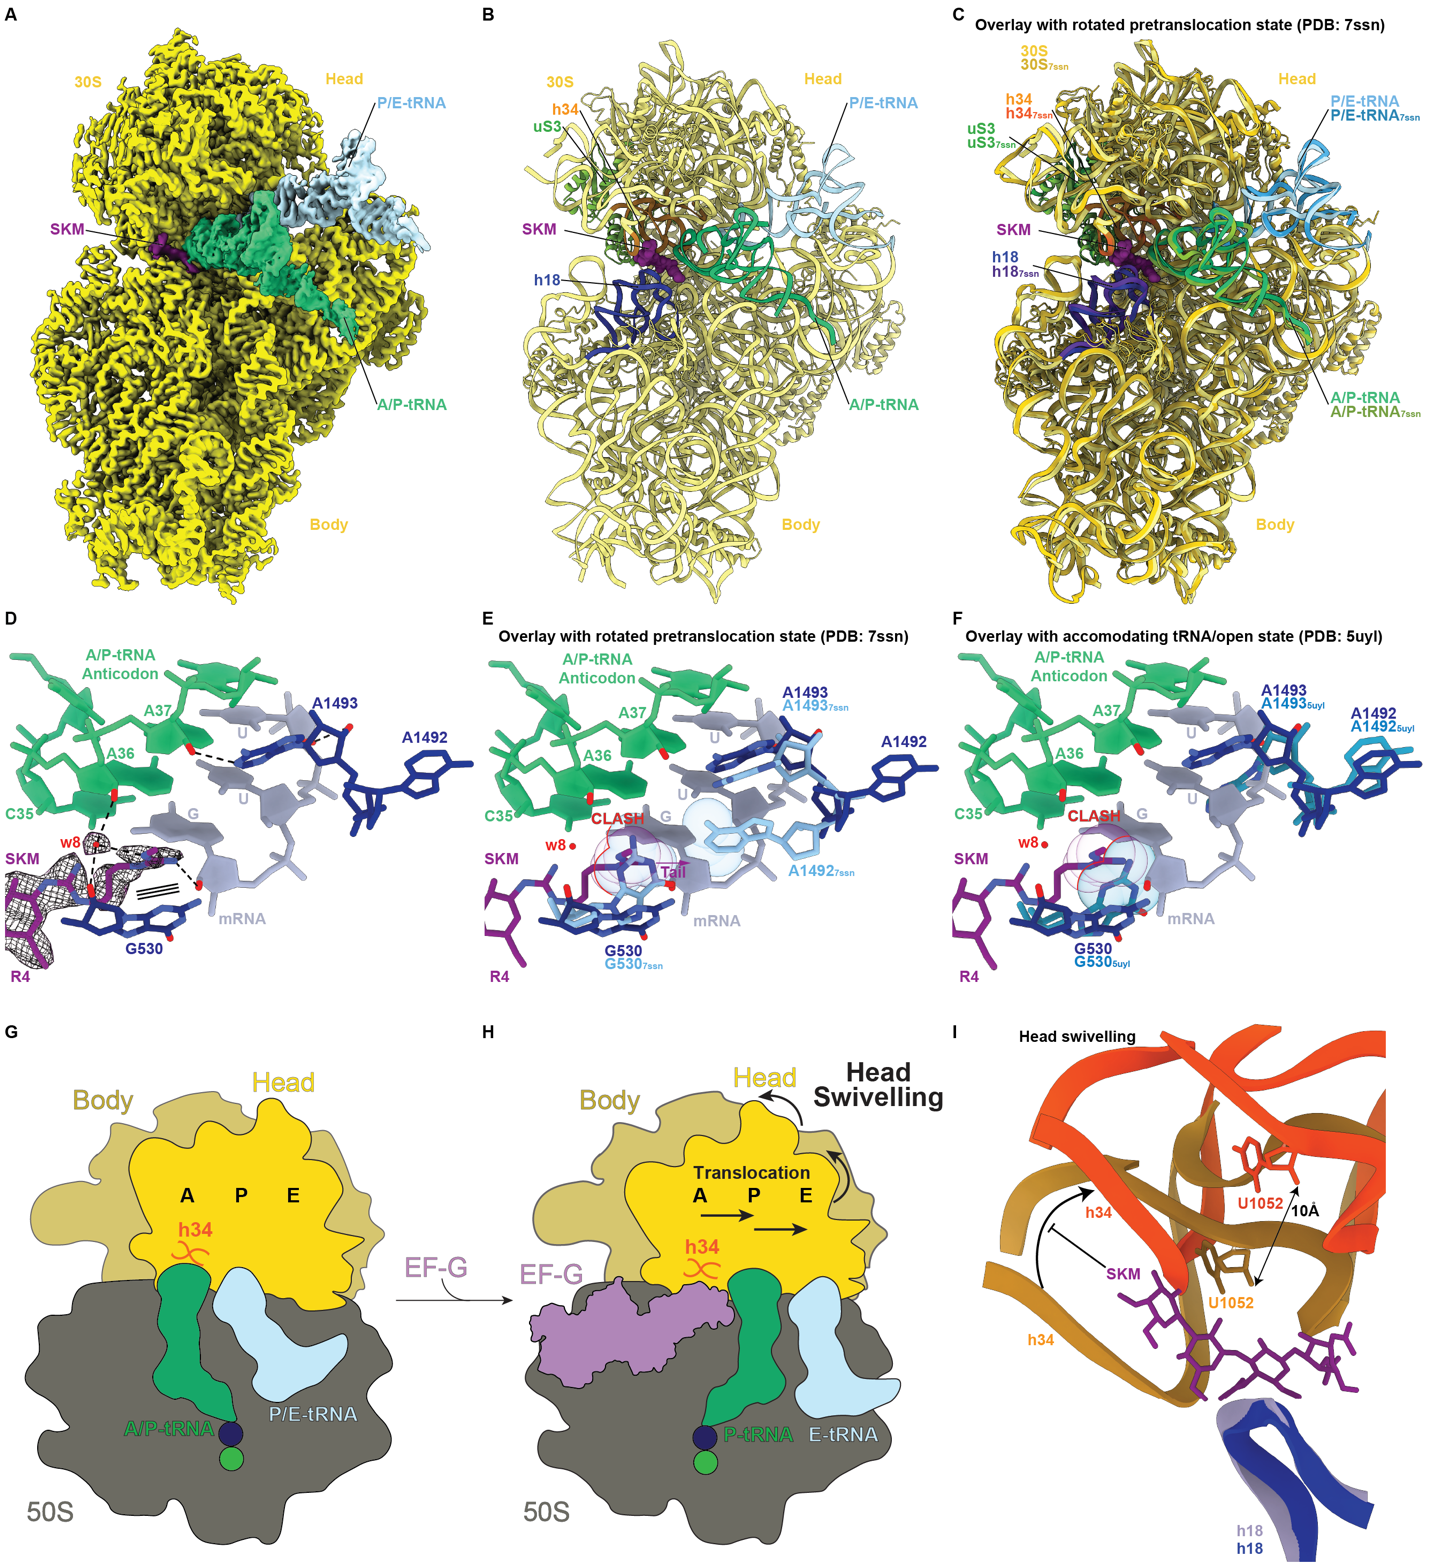
**

**Fig. S25. Structural features of SKM-70S State 5. A**. Cryo-EM map of the 30S subunit (yellow) of SKM-stalled ribosome (State 5) with hybrid P/E-tRNA (cyan), A/P-tRNA (dark green) and SKM (purple). **B**. Molecular model for State 5 from (a), with 30S (yellow), P/E-tRNA (cyan), A/P-tRNA (dark green), SKM (purple), h18 (blue), h34 (gold), and uS3 (green). **C.** Overlay of (**B**) with PDB ID 7SSN9; for the latter, the 30S (dark yellow), P/E-tRNA (light blue), A/P-tRNA (lime), h18 (violet), h34 (orange), and uS3 (forest green) are shown. **D.** Cryo-EM density (mesh) for tail of SKM from State 5 stacking on G530 of h18 (blue) and forming potential hydrogen bonds (black dashed line) with the 2´-OH of the third nucleotide (G) of the Leu mRNA codon (indigo) at position 2 of the template, and a structural water (w8, red sphere); w8 also forms a potential hydrogen bond with the 2´-OH of A36 of the A/P-tRNA anticodon (dark green). Bases A1492 (retracted, OFF-state) and A1493 (decoding) are also shown in blue. **E.** Overlay of the model of State 5 shown in (**D**) with decoding center bases of PDB ID 7SSN9 shown in light cyan. Clashes are highlighted, resulting from SKM tail occupying the space that G530 from 7SSN would invade for latching and extending (purple arrow) toward A1492 from 7SSN ON-state upon decoding. **F.** Overlay of the model of State 5 shown in (**D**) with decoding center bases of PDB ID 5UYL10 shown in dark cyan. Clashes are highlighted, resulting from SKM tail occupying the space that G530 from 5UYL would invade for latching while the incoming tRNA is accommodating in the A-site. **G-H**. Schematic showing (**G**) pre-translocation state with rotated ribosome and hybrid A/P- and P/E-tRNAs that is a substrate for EF-G (purple) binding, leading to (**H**) 30S head swiveling and concomitant movement of the tRNAs in the P- and E-sites. **I**. Movement of h34 with respect to h18 when comparing State 1 (gold) with the swiveled head observed during translocation (orange) (PDB ID 7SSD)9. Binding of SKM (purple) is incompatible with the head swiveled conformation.

**
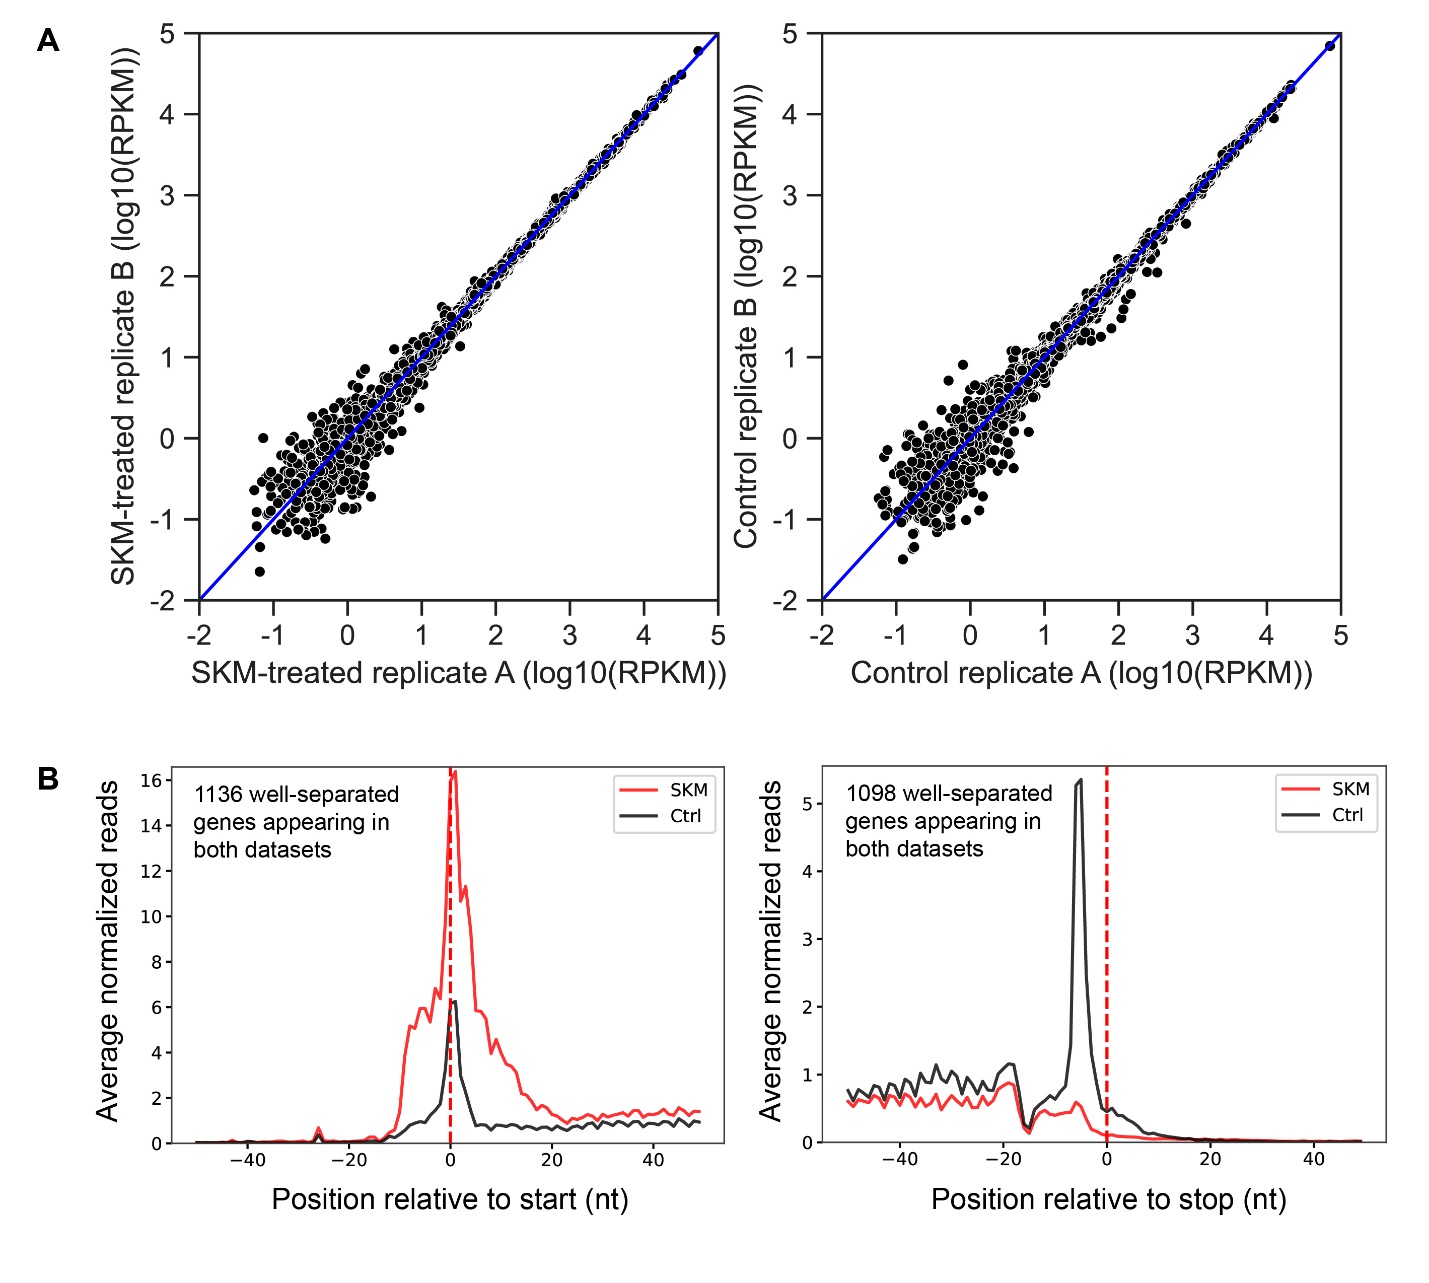
**

**Figure S26**. **Consistency of ribosome profiling replicates and metagene analysis.** **A.** Scatter plots comparing data obtained in independent Ribo-seq experiments. Plots show the number of reads [in reads per million per kilobase (RPKM)] mapped to each of *E. coli* protein-coding genes in the Ribo-seq libraries prepared from SKM-treated (left) and untreated control cells (right). Each black dot represents one gene. **B.** Metagene analysis of ribosome density around the start and stop codons of the well-separated (>50 bp apart) genes in SKM-treated (red line) or untreated (black like) cells based on the Ribo-seq results.

**
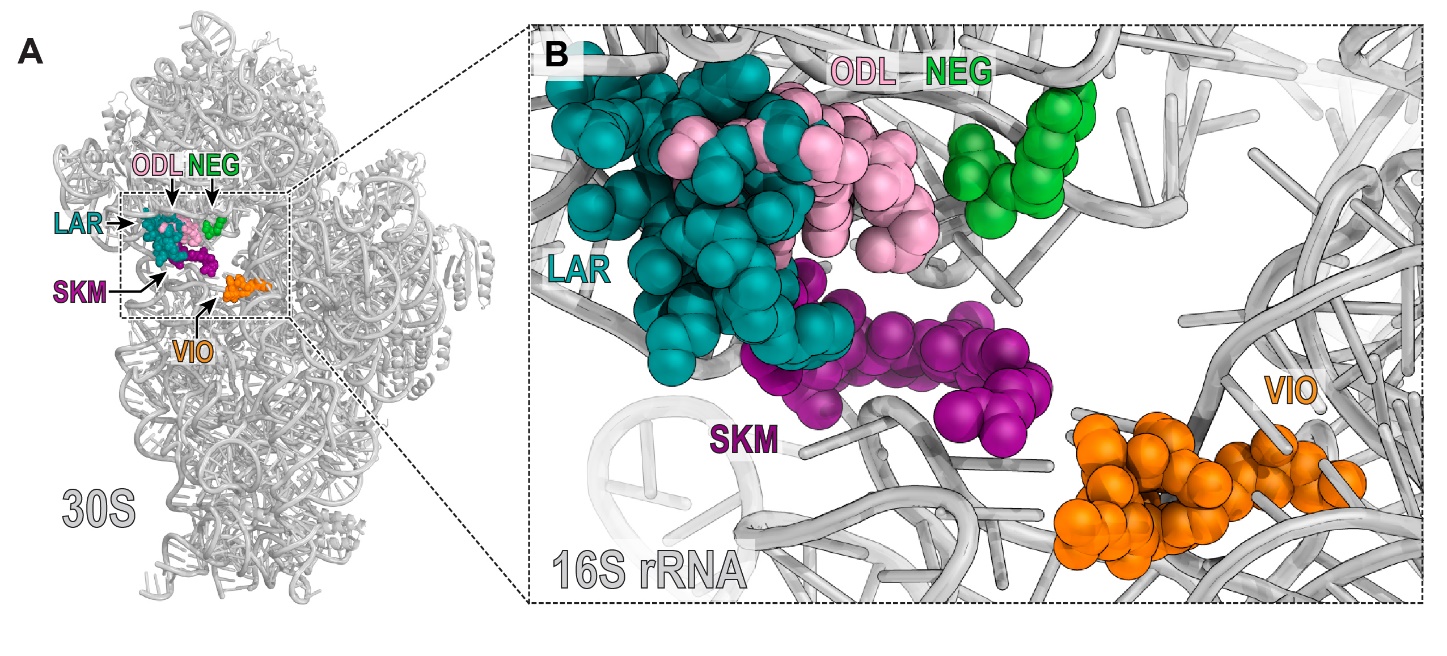
**

**Figure S27. Superposition of select structures of antibiotics binding the small ribosomal subunit.** Overview (**A**) and close-up views (**B**) of the ribosome-bound SKM (purple) of lariocidin (LAR, teal, PDB ID: 9DFC), odilorhabdin NOSO-95179 (ODL, pink, PDB ID: 6CAE), negamycin (NEG, green, PDB ID: 4W2I), and viomycin (VIO, orange, PDB ID: 4V7L).

**
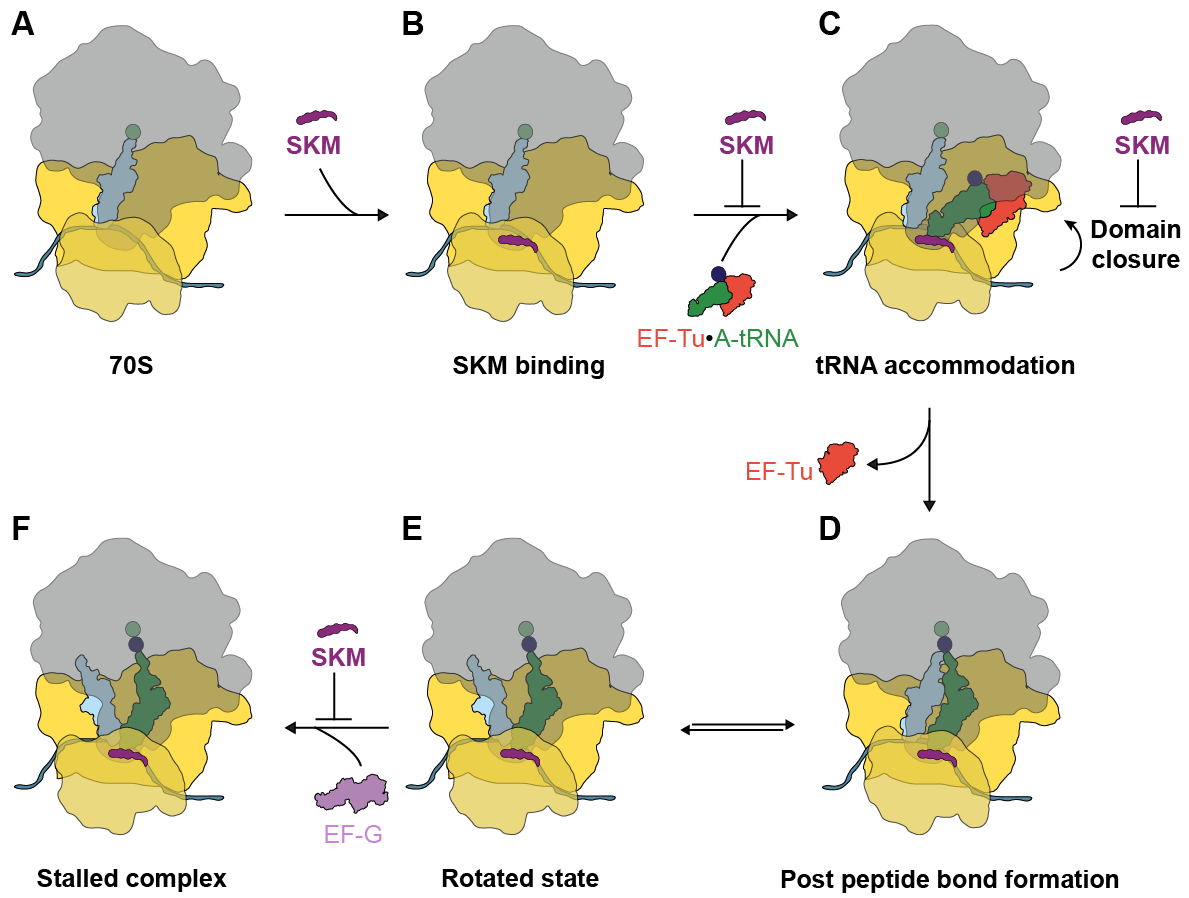
**

**Fig. S28 Mechanism of action of inhibition of SKM during translation elongation. A,** SKM binds to the initiation state with P-site tRNA, stabilizing the (**B**) canonical A-site vacant state (State 1, major state). **C,** SKM presence hampers the delivery and decoding of the aminoacyl-tRNA to the A-site by EF-Tu by inhibiting latching. **D,** Despite the presence of SKM, in a minor fraction of ribosomes, the A-tRNA properly accommodates, latching occurs and EF-Tu leaves the ribosomal complex. **E,** Following peptide bond formation, the ribosomes can continuously interconvert between the (**D**) canonical and (**E**) rotated states of the ribosome. **F,** The head swivelling catalyzed by EF-G required to achieve the post-translocation state is likely to be inhibited by SKM, thereby trapping the ribosome in the pretranslocational state.The color code used for the components depicted is the same used for those throughout the manuscript, with EF-Tu in light red and EF-G in faint lilac.

**Table S1. H and C NMR Data of SKM.**

**Table S1, 1H and 13C NMR Data of SKM.**

| No. | *δ*H | *δ*C | No. | *δ*H | *δ*C |
| --- | --- | --- | --- | --- | --- |
| 2 |  | 156.1 | 4’ | 5.18 (d, *J* = 3.3 Hz) | 70.6 |
| 4 | 3.18 (2H, br m) | 40.9 | 5’ | 3.85 (dd, *J* = 7.7, 3.9 Hz) | 75.2 |
| 5 | 1.52 (2H, m, overlapped) | 25.2 | 6’ | 3.47 (m, overlapped)  3.57 (m, overlapped) | 60.2 |
| 6 | 1.50 (2H, m, overlapped) | 25.3 | 7’ |  | 158.3 |
| 7 | 3.09 (2H, m, overlapped) | 40.6 | 1” | 4.59 (d, *J* = 8.3 Hz) | 102.9 |
| 9, 16,  23, 30 | 3.09 (2H, m, overlapped) | 154.9 | 2’’ | 3.46 (m, overlapped) | 73.7 |
| 11, 14, 18,  21, 25, 28, 32,  35 | 3.09 (2H, m, overlapped) | 40.5 | 3’’ | 3.72 (m, overlapped) | 81.1 |
| 12, 13, 19,  20, 26, 27,  33, 34 | 1.50 (2H, m, overlapped) | 25.3 | 4’’ | 3.68 (m, overlapped) | 49.7 |
|  |  |  | 5’’ | 3.43 (m, overlapped) | 74.8 |
| 37 |  | 177.0 | 6’’ | 3.59 (m, overlapped)  3.46 (m, overlapped) | 60.9 |
| 38 | 2.12 (2H, t, *J* = 7.0 Hz) | 35.6 | 7’’ |  | 174.7 |
| 39 | 1.45 (2H, m, overlapped) | 28.0 | 8’’ | 1.92 (3H, s) | 22.1 |
| 40 | 1.17 (2H, m, overlapped) | 25.3 | 1”’ | 4.51 (d, *J* = 8.2 Hz) | 103.3 |
| 41 | 1.14 (2H, m, overlapped) | 28.2 | 2’’’ | 3.55 (m, overlapped) | 70.4 |
| 42 | 1.44 (2H, m, overlapped) | 25.3 | 3”’ | 3.67 (m, overlapped) | 82.0 |
| 43 | 1.14 (2H, m, overlapped) | 28.4 | 4’’’ | 4.05 (m, overlapped) | 68.4 |
| 44 | 1.18 (2H, m, overlapped) | 25.5 | 5”’ | 3.57 (m, overlapped) | 74.6 |
| 45 | 1.13 (2H, m, overlapped) | 27.9 | 6”’ | 3.56 (m, overlapped)  3.46 (m, overlapped) | 61.1 |
| 46 | 1.44 (2H, m, overlapped) | 25.7 | 1”” | 4.46 (d, *J* = 7.7 Hz) | 104.1 |
| 47 | 3.05 (2H, t, *J* = 7.0 Hz) | 40.6 | 2”” | 3.44 (m, overlapped) | 71.3 |
| 49 |  | 155.6 | 3”” | 3.59 (m, overlapped) | 72.8 |
| 51-54 | 2.71 (3H, s) | 27.2 | 4”” | 3.51 (m, overlapped) | 78.9 |
| 55 | 2.70 (3H, s) | 27.1 | 5”” | 3.57 (m, overlapped) | 75.1 |
| 1’ | 4.66 (d, *J* = 8.2 Hz) | 81.8 | 6”” | 3.56 (m, overlapped)  3.66 (m, overlapped) | 60.4 |
| 2’ | 3.77 (m, overlapped) | 68.3 | 7”” | 3.41 (3H, s) | 61.3 |
| 3’ | 3.94 (dd, *J* = 9.8, 3.3 Hz) | 80.6 |  |  |  |

**Table S2. Summary of SKM BGC.**

| ***orf*** | **AA** | **Homolog (Accession, S/I %)** | **Proposed function** |
| --- | --- | --- | --- |
| *-1* | 139 | amino acid transporter (WP_030195661.1, 86/82) | Transporter |
| *sasR* | 299 | putative LuxR family transcriptional regulator (KDN85371.1, 64/45) | Regulator |
| *sasA* | 367 | protein arginine N-methyltransferase 1 (SDM24947.1, 62/46) | Arginine N-methyltransferase |
| *sasB* | 454 | glycosyltransferase family 2 protein (WP_053433326.1, 50/31) | Glycosyltransferase |
| *sasC* | 555 | Carbamoyltransferase (WP_110121283.1, 52/34) | Carbamoyltransferase |
| *sasD* | 599 | DegT/DnrJ/EryC1/StrS family aminotransferase (RKJ36437.1, 54/35) | Aminotransferase |
| *sasE* | 340 | UDP-glucose 4-epimerase (GBE20934.1, 53/38) | Epimerase |
| *sasF* | 351 | glycosyltransferase family 2 protein (WP_132430137.1, 44/30) | Glycosyltransferase |
| *sasG* | 322 | Amidinotransferase (OLB34709.1, 72/60) | Amidinotransferase |
| *sasH* | 245 | phosphatidylserine decarboxylase (PWU20886.1, 75/60) | Decarboxylase |
| *sasI* | 253 | phosphatidylserine decarboxylase (PYP52464.1, 80/62) | Decarboxylase |
| *sasJ* | 341 | mycothiol synthase (SFF95723.1, 46/33) | N-acyltransferase |
| *sasT* | 312 | Multidrug ABC transporter ATPase/permease (WP_015109135.1, 60/40) | ABC transporter ATPase |
| *sasK* | 592 | DegT/DnrJ/EryC1/StrS family aminotransferase (WP_027417272.1, 48/36) | Aminotransferase |
| *sasL* | 233 | Acetyltransferase (ABW10723.1, 62/47) | Acetyltransferase |
| *sasM* | 233 | class I SAM-dependent methyltransferase (TAE96168.1, 58/42) | Methyltransferase |
| *sasN* | 156 | tRNA/rRNA methyltransferase (EDY50587.1, 85/77) | Methyltransferase |
| *sasO* | 270 | methyltransferase family protein (RZT84174.1, 77/66) | Methyltransferase |
| *sasP* | 543 | Acyl-CoA synthetase (AMP-forming)/AMP-acid ligase II (SNS97851.1, 62/47) | Acyl-CoA ligase |
| *sasQ* | 400 | NAD-dependent aldehyde dehydrogenase (AKG44430.1, 73/57) | Aldehyde dehydrogenase |
| *sasS* | 569 | thiamine pyrophosphate enzyme (EWM11118.1, 67/55) | Deaminase |
| *sasU* | 420 | beta-ketoacyl-[acyl-carrier-protein] synthase II (OUM88315.1, 67/50) | Ketosynthase |

**Table S3. Minimum inhibitory concentrations**

|  | **Isoniazid** | **Azithromycin** | **SKM** | |
| --- | --- | --- | --- | --- |
| **Bacterial strain** | MIC  (µg/mL) | MIC  (µg/mL) | MIC  (µg/mL) | MBC  (µg/mL) |
| *M. smegmatis* mc2155 | 4 | - | 0.002 | 0.032 |
| *M. fortuitum* subsp. *fortuitum* ATCC 6841 | 4 | - | 0.063-0.13 | - |
| *M. abscessus* ATCC 19977 | 128 | - | 0.5-1 | - |
| *M. tuberculosis* H37Ra | 0.031 | - | 0.063-0.13 | 0.5 |
| *M. tuberculosis* Erdman | - | - | 0.03-0.15 | - |
| *M. bovis* BCG Pasteur ATCC 35734 | 0.13-0.25 | - | 0.013 | - |
| *M. ulcerans* ATCC 19423 | 16-32 | - | 1 | - |
| *M. avium* subsp. *avium* ATCC 25291 | >64 | - | 8-16 | - |
| *E. coli* BW25113 | - | - | >64 | - |
| *E. coli* BW25113 Δ*tolC*Δ*bamB* | - | - | 64 | - |
| *S. aureus* ATCC 29213 | - | - | >64 | - |
| *Neisseria gonorrhoeae* ATCC 49226 | - | 0.25 | 64 | - |
| *Helicobacter pylori* ATCC 43504 | - | 0.25 | 16 | - |
| *Tsukamurella* sp. WAC06889b | - | - | 0.5-2 | - |
| *Nocardia yamanashiensis* | - | - | 2-8 | - |
| *Corynebacterium striatum* | - | - | 0.002-0.008 | - |
| *C. aurimucosum* | - | - | 0.015-0.063 | - |
| *C. amycolatum* GC43 | - | - | 0.002 | - |
| *Rhodococcus equi* | - | - | 1-4 | - |

**Table S4: Minimum inhibitory concentrations of modified organisms versus SKM**

| **Heterologous expression strains** | | | | | | | |
| --- | --- | --- | --- | --- | --- | --- | --- |
|  | | **SKM MIC (µg/mL)** | | | | | |
| **Bacterial strain** | | vector | SasN | | SasO | | SasNO |
| *S. coelicolor* M1154 + pIJ10257 | | <0.25 | 1 | | 16 | | 16 |
| *S. venezuelae* ATCC 10712 | | 8 | 16 | | >128 | | >128 |
| *M. smegmatis* mc2155 | | 0.008 | 0.032 | | 4 | | 8 |
|  | | GFP | | LysX | | LysX(L59K) | |
| *M. smegmatis* mc2155 | | 0.008 | | 0.008 | | 0.032 | |
| *M. smegmatis* mc2155 (SKMR) | | 0.064 | | 0.064 | | ND | |
| **Deletion strains** | | | | | | | |
| *E. coli* BW25113 | 64 | | | | | | |
| *E. coli* BW25113 Δ*rsmC* | < 0.25 | | | | | | |
| *E. coli* BW25113 Δ*lasT* | 64 | | | | | | |
| *S. aureus* USA300 | 64 | | | | | | |
| *S. aureus* USA300 Δ*SAUSA300_0526* | 2 | | | | | | |
| *S. aureus* USA300 Δ*SAUSA300_0517* | 64 | | | | | | |
| **Strains with mutations in 16S rRNA** | | | | | | | |
| *E. coli* SQ110 Δ*rsmC* | 1 | | | | | | |
| *E. coli* SQ110 Δ*rsmC rrsE-*G1206A | 128 | | | | | | |
| *E. coli* SQ110 Δ*rsmC rrsE-*G1207U | 16 | | | | | | |
| *E. coli* SQ110 Δ*rsmC rrsE-*C1051U | 4 | | | | | | |
| *E. coli* SQ110 Δ*rsmC rrsE-*C1054A | 16 | | | | | | |

**Table S5. Cryo-EM data collection, refinement and validation statistics**

|  | **State 1** | **State 3** | **State 5** |
| --- | --- | --- | --- |
| **Data collection and processing** |  |  |  |
| Magnification | 105,000x | 105,000x | 105,000x |
| Acceleration voltage (kV) | 300 | 300 | 300 |
| Electron exposure (e−/Å2) | 40 | 40 | 40 |
| Defocus range (μm) | −0.3 –−1.0 | −0.3 –−1.0 | −0.3 –−1.0 |
| Pixel size (Å) | 0.832 | 0.832 | 0.832 |
| Symmetry imposed | C1 | C1 | C1 |
| Initial particle images (no.) | 1,173,207 | 1,173,207 | 1,173,207 |
| Final particle images (no.) | 343,986 | 103,241 | 121,168 |
| Map resolution (Å)  FSC threshold | 2.3  0.143 | 2.6  0.143 | 2.6  0.143 |
| **Refinement** |  |  |  |
| Initial model used (PDB code) | 7K00 | 7K00 | 7K00 |
| Model resolution (masked, Å)  FSC threshold | 2.3  0.5 | 2.6  0.5 | 2.6  0.5 |
| CC (mask) | 0.70 | 0.77 | 0.81 |
| CC (volume) | 0.69 | 0.77 | 0.79 |
| Map sharpening *B* factor (Å2) | -52.9 | -69.5 | -50.2 |
| Model composition  Non-hydrogen atoms  Protein residues  RNA residues  Waters  Magnesium (MG)  Antibiotics* | 148,201  5,631  4,451  8,154  313  SKM | 149,100  5,532  4,529  8,124  313  SKM | 104,696  5,270  4,527  1,750  309  SKM |
| *B* factors (Å2)  Protein  RNA  Ligand  Water | 105.16  89.19  74.70  80.66 | 113.65  104.08  93.93  94.59 | 104.12  101.50  80.12  67.17 |
| R.m.s. deviations  Bond lengths (Å)  Bond angles (°) | 0.008  1.141 | 0.008  1.134 | 0.009  1.209 |
| Validation  MolProbity score  Clashscore  Poor rotamers (%) | 1.09  0.82  0.67 | 1.10  0.90  0.71 | 1.11  0.90  0.78 |
| Ramachandran plot  Favored (%)  Allowed (%)  Disallowed (%)  Ramachandran Z-score | 95.20  4.73  0.07  −2.52 | 95.29  4.54  0.17  −2.90 | 94.69  5.23  0.08  −2.90 |

**Table S6. Strains and plasmids used in this study.**

| **Strains** | **Description** | **Source** |
| --- | --- | --- |
| *E. coli* Top10 | General cloning and plasmid maintenance | Invitrogen |
| *E. coli* ET12567/pR9406 | *E. coli*-*Streptomyces* tri-parental mating helper strain | 11 |
| *E. coli* SQ110 Δ*tolC* | *E. coli* strain harbouring a single *rrn*-operon (*rrnE*) | 12,13 |
| *E. coli* SQ110 Δ*tolC*Δ*rsmC* | Strain used to select SKM-resistant mutants with point mutations in 16S rRNA gene (*rsmC::neo)* | This work |
| *E. coli* BW25113 ∆*bamB*∆*tolC* | Indicator strain | Lab stock |
| *E. coli* BW25113 ∆*rsmC* | BW25113 *rsmC::neo* | Brown lab |
| *E. coli* BW25113 ∆*lasT* | BW25113 *lasT::neo* | Brown lab |
| *E. coli* BW25113 Δ*tolC*Δ*rsmC* | BW25113 Δ*tolC* *rsmC::neo,* strain used for the ribosome profiling experiment | This work |
| *S. cerevisiae* VL6-48N | *MAT α, his3-D200, trp1-Δ1, ura3-Δ1, lys2, ade2−101, met14, psi+cirO*, TAR host strain | 14 |
| *S. coelicolor* M1152 | Δ*act* Δ*red* Δ*cpk* Δ*cda* *rpoB*[C1298T] | 15 |
| *S. coelicolor* M1154 | Δ*act* Δ*red* Δ*cpk* Δ*cda* *rpoB*[C1298T] *rpsL*[A262G] | 15 |
| *S.* sp. WAC00040 | SKM producer | Lab stock |
| *S. coelicolor* M1152/pWAC40 | SKM heterologous expression strain | This work |
| *S. coelicolor* M1154/pIJ10257 | pIJ10257 based expression control strain | This work |
| *S. coelicolor* M1154/pSasN | *sasN* heterologous expression strain | This work |
| *S. coelicolor* M1154/pSasO | *sasO* heterologous expression strain | This work |
| *S. coelicolor* M1154/pSasNO | *sasNO* heterologous expression strain | This work |
| *S. venezuelae* ATCC 10712 |  | Lab stock |
| *S. venezuelae* ATCC 10712/pIJ10257 | pIJ10257 based expression control strain for *Streptomyces* CFE TX-TL inhibition assay | This work |
| *S. venezuelae* ATCC 10712/pSasN | *sasN* heterologous expression strain for *Streptomyces* CFE TX-TL inhibition assay | This work |
| *S. venezuelae* ATCC 10712/pSasO | *sasO* heterologous expression strain for *Streptomyces* CFE TX-TL inhibition assay | This work |
| *S. venezuelae* ATCC 10712/pSasNO | *sasNO* heterologous expression strain for *Streptomyces* CFE TX-TL inhibition assay | This work |
| *S. aureus* ATCC 29213 | Indicator strain | Lab stock |
| *S. aureus* USA300 | Indicator strain | Lab stock |
| *S. aureus* USA300∆*0517::Tn* | *S. aureus* USA300 transposon mutant of *SAUSA300_0517* | Brown lab |
| *S. aureus* USA300∆*0526::Tn* | *S. aureus* USA300 transposon mutant of *SAUSA300_0526* | Brown lab |
| *M. smegmatis* mc2155 | Indicator strain | Lab stock |
| *M. fortuitum* subsp. *fortuitum* ATCC 6841 | Indicator strain | Lab stock |
| *M. abscessus* ATCC 19977 | Indicator strain | Lab stock |
| *M. tuberculosis* H37Ra | Indicator strain | Lab stock |
| *M. bovis* BCG Pasteur ATCC 35734 | Indicator strain | Lab stock |
| *M. ulcerans* ATCC 19423 | Indicator strain | Lab stock |
| *M. avium* subsp. *avium* ATCC 25291 | Indicator strain | Lab stock |
| *N. yamanashiensis* | Indicator strain | Lab stock |
| *Tsukamurella* sp. WAC 06889b | Indicator strain | Lab stock |
| *R. equi* | Indicator strain | Lab stock |
| *C. striatum* | Indicator strain | Lab stock |
| *C. aurimucosum* | Indicator strain | Lab stock |
| *C. amycolatum* GC43 | Indicator strain | Lab stock |
| *C. amycolatum* GC54 | Indicator strain | Lab stock |
| *C. amycolatum* GC56 | Indicator strain | Lab stock |
| **Plasmids** |  |  |
| pCAP03-aac(3)IV | *ura3 CEN/ARS Trp1 ori tarJ-oriT attP-int*ΦC31 *neo aac(3)IV*, Tar cloning capture vector | 16 |
| pWAC40 | pCAP03 bearing sas BGC | This work |
| pIJ10257 | *hph ermEp* traJ-oriT attp-intΦBT1*, *Streptomyces* gene over-expression under the control of ermEp* strong promoter | 17 |
| pSasN | *sasN* overexpression construct on pIJ10257 | This work |
| pSasO | *sasO* overexpression construct on pIJ10257 | This work |
| pSasNO | *sasNO* overexpression construct on pIJ10257 | This work |

**Table S7. gBlock and primers used in this study.**

| **Name** | **Sequence (5ꞌ-3ꞌ)** | **Description** |
| --- | --- | --- |
| sas-gblock | gcctcccatggtataaatagtggCGACAAGGACAAGGAGAAGGACCGGGGCAAGCCGGACGACGGCAAGCCCGGTttaAACGGCAAGGTCCTGTCCGACCAGCACTTCGTGTTCTTCAACAACCTCAAGAGCCtaggtatgtcgaaagctacatataagga | TAR cloning targeting construct |
| **Primers** | |  |
| sas-dF | gaaggtatgcggaaggtatgac | TAR diagnostic primers |
| sas-dR | aatgcctggaagcctgtga |
| sasN-F | tctagaacaggaggccccatatgcagcagctcagagg | *sasN* cloning primers |
| sasN-R | gagaacctaggatccaagcttcagtccttttcgagccc |
| sasO-F | tctagaacaggaggccccatatggcgcgggtcatc | *sasO* cloning primers |
| sasO-R | gagaacctaggatccaagctgacctgtgcaaacgctt |
| sasNO-F | tctagaacaggaggccccatatggcgcgggtcatc | *sasNO* cloning primers |
| sasNO-R | gagaacctaggatccaagcttcagtcctttcgagccc |
| pIJ-sF | atcttgacggctggcgaga | Sequencing primers |
| pIJ-sR | ggcattgagcgtcagcata |
| lysX-UP | cgaccgagcgcaacgcgtgccgtgacagtctagcaggcatgacc | *lysX* cloning primers |
| lysX-DN | tcgtacgctagttaactacggatcgcgatccacacccacagtg |
| lysX-QC-F | ggtgaggtccaattgctgtt | *lysX* colony PCR primers |
| lysX-QC-R | atccgcagatacaggtccag |
| lysX-seq | gcatattctcccggcctatg | *lysX* sequencing primer |
| luxA-Junc-F | ttattgcttccatgaagctgttccagtctgatgtcatgc | pMV306SapI cloning primers |
| luxA-Junc-R | gcatgacatcagactggaacagcttcatggaagcaataatttc |
| luxAstart-Junc-F | gcggccgctctagagctcttcaatgaaatttggaaactttttgcttac |
| upstrPr-Junc-R | tccaaatttcattgaagagctctagagcggccgcac |
| kanR-Junc-F | acagtaatacaaggggtgttatgagccatattcaacggga |
| kanR-Junc-R | tcccgttgaatatggctcataacaccccttgtattactgtttat |
| MV306-F | ccctgattctgtggataacc | pMV306SapI colony PCR and sequencing primers |
| MV306-R | cgctagttaactacgtcgacatc |
| luxJun-seq | cgaaatcaatcccgtgg |
| kanJun-seq | gcaacaaagcgacgt |
| A37-F | ggccgcctagagattgcgaaggttcaatccaccgacgtacactgtactc | Constitutive promoter for *M. smegmatis* |
| A37-R | catgagtacagtgtacgtcggtggattgaaccttcgcaatctctaggc |
| Msm-sasO-F | cactgtactcatggcgcgggtcatctgggt | *Msm* *sasO* cloning  primers |
| Msm-sasO-R | ttgcaggatattatccgctaggagaggtttggtgatggtg |
| A37-O-F | tagcggataatatcctgcaatcaagcttatc |
| A37-O-R | cccgcgccatgagtacagtgtacgtcgg |
| Msm-sasN-F | cactgtactcatgcagcagctcagaggcac | *Msm* *sasN* cloning  primers |
| Msm-sasN-R | ttgcaggatatcagtccttttcgagcccg |
| A37-N-F | aaaggactgatatcctgcaatcaagcttatc |
| A37-N-R | gctgctgcatgagtacagtgtacgtcgg |
| rsmC_F | cgaatcgctcctgttgtcag | Verification of *rsmC* knockout in SQ110Δ*tolC* |
| KanR_rev | gcagttcattcagggcaccg |
| rrnE_F | ttgcatggtaaatcccctg | rDNA amplification |
| rrnE_R | ttgcagaacaagatcttgcag |
| S1243 | gccattgtagcacgtgtg | Primer extension |
| S1116 | aagggttgcgctcgttgcg |
| MF_F1 | attaatacgactcactatagggcaacctaaaacttacacacgccccggtaaggaaataaaaat | Amplification of template encoding model mRNA |
| MF_F2 | gccccggtaaggaaataaaaatgttcaaagcattcaaaaacatcatacgtactcgtactc |
| MF_R | ggttataatgaattttgcttattaaccttgcctgcgcttaaagagtacgagtacgtatgatgt |
| NV1 | ggttataatgaattttgcttattaa | Toeprinting |
| M1154-BC1-A | **p**ggcttcttcttgctcttaggtagtaggttc | Nanopore sequencing |
| M1154-BC1-B | gaggcgagcggtcaattttcctaagagcaagaagaagccagaaaggaggtgatccagcc |
| sasO-BC2-A | **p**gtacttttctctttgcgcggtagtaggttc |
| sasO-BC2-B | gaggcgagcggtcaattttccgcgcaaagagaaaagtacagaaaggaggtgatccagcc |

**References**

1. Subramanian, A., Tamayo, P., Mootha, V.K., Mukherjee, S., Ebert, B.L., Gillette, M.A., Paulovich, A., Pomeroy, S.L., Golub, T.R., Lander, E.S., and Mesirov, J.P. (2005). Gene set enrichment analysis: a knowledge-based approach for interpreting genome-wide expression profiles. Proc Natl Acad Sci U S A *102*, 15545-15550. 10.1073/pnas.0506580102.

2. Korotkevich, G., Sukhov, V., Budin, N., Shpak, B., Artyomov, M.N., and Sergushichev, A. (2021). Fast gene set enrichment analysis. bioRxiv, 060012. 10.1101/060012.

3. Abramson, J., Adler, J., Dunger, J., Evans, R., Green, T., Pritzel, A., Ronneberger, O., Willmore, L., Ballard, A.J., Bambrick, J., et al. (2024). Accurate structure prediction of biomolecular interactions with AlphaFold 3. Nature *630*, 493-500. 10.1038/s41586-024-07487-w.

4. Holm, L., Laiho, A., Toronen, P., and Salgado, M. (2023). DALI shines a light on remote homologs: One hundred discoveries. Protein Sci *32*, e4519. 10.1002/pro.4519.

5. Schrodinger, LLC (2015). The PyMOL Molecular Graphics System, Version 3.03.

6. Leger, A., Amaral, P.P., Pandolfini, L., Capitanchik, C., Capraro, F., Miano, V., Migliori, V., Toolan-Kerr, P., Sideri, T., Enright, A.J., et al. (2021). RNA modifications detection by comparative Nanopore direct RNA sequencing. Nat Commun *12*, 7198. 10.1038/s41467-021-27393-3.

7. Smith, M.A., Ersavas, T., Ferguson, J.M., Liu, H., Lucas, M.C., Begik, O., Bojarski, L., Barton, K., and Novoa, E.M. (2020). Molecular barcoding of native RNAs using nanopore sequencing and deep learning. Genome Res *30*, 1345-1353. 10.1101/gr.260836.120.

8. Smith, A.M., Jain, M., Mulroney, L., Garalde, D.R., and Akeson, M. (2019). Reading canonical and modified nucleobases in 16S ribosomal RNA using nanopore native RNA sequencing. PLoS One *14*, e0216709. 10.1371/journal.pone.0216709.

9. Carbone, C.E., Loveland, A.B., Gamper, H.B., Jr., Hou, Y.M., Demo, G., and Korostelev, A.A. (2021). Time-resolved cryo-EM visualizes ribosomal translocation with EF-G and GTP. Nat Commun *12*, 7236. 10.1038/s41467-021-27415-0.

10. Loveland, A.B., Demo, G., Grigorieff, N., and Korostelev, A.A. (2017). Ensemble cryo-EM elucidates the mechanism of translation fidelity. Nature *546*, 113-117. 10.1038/nature22397.

11. Jones, A.C., Gust, B., Kulik, A., Heide, L., Buttner, M.J., and Bibb, M.J. (2013). Phage p1-derived artificial chromosomes facilitate heterologous expression of the FK506 gene cluster. PLoS One *8*, e69319. 10.1371/journal.pone.0069319.

12. Orelle, C., Carlson, S., Kaushal, B., Almutairi, M.M., Liu, H., Ochabowicz, A., Quan, S., Pham, V.C., Squires, C.L., Murphy, B.T., and Mankin, A.S. (2013). Tools for characterizing bacterial protein synthesis inhibitors. Antimicrob Agents Chemother *57*, 5994-6004. 10.1128/AAC.01673-13.

13. Quan, S., Skovgaard, O., McLaughlin, R.E., Buurman, E.T., and Squires, C.L. (2015). Markerless Escherichia coli rrn Deletion Strains for Genetic Determination of Ribosomal Binding Sites. G3 (Bethesda) *5*, 2555-2557. 10.1534/g3.115.022301.

14. Noskov, V., Kouprina, N., Leem, S.H., Koriabine, M., Barrett, J.C., and Larionov, V. (2002). A genetic system for direct selection of gene-positive clones during recombinational cloning in yeast. Nucleic acids research *30*, E8. 10.1093/nar/30.2.e8.

15. Gomez-Escribano, J.P., and Bibb, M.J. (2011). Engineering *Streptomyces coelicolor* for heterologous expression of secondary metabolite gene clusters. Microbial biotechnology *4*, 207-215. 10.1111/j.1751-7915.2010.00219.x.

16. Tang, X., Li, J., Millan-Aguinaga, N., Zhang, J.J., O'Neill, E.C., Ugalde, J.A., Jensen, P.R., Mantovani, S.M., and Moore, B.S. (2015). Identification of thiotetronic acid antibiotic biosynthetic pathways by target-directed genome mining. ACS chemical biology *10*, 2841-2849. 10.1021/acschembio.5b00658.

17. Hong, H.J., Hutchings, M.I., Hill, L.M., and Buttner, M.J. (2005). The role of the novel Fem protein VanK in vancomycin resistance in *Streptomyces coelicolor*. The Journal of biological chemistry *280*, 13055-13061. 10.1074/jbc.M413801200.
